# Supplementary material for: Large-area Magnetic Skin for Multi-point and Multi-scale Tactile Sensing with Super-resolution
Source: Research Square preprint supplement (doi:10.21203/rs.3.rs-3722802/v1), 2024-01-11
Supplement: Supplementary file 1 [file fbcf081f656dee6440910c34.docx]

Supplementary Materials for

**Large-area magnetic skin for multi-point and multi-scale tactile sensing with super-resolution**

Hao Hu, Chengqian Zhang*, Xinyi Lai, Huangzhe Dai, Chengfeng Pan, Haonan Sun, Daofan Tang, Zhezai Hu, Jianzhong Fu, Tiefeng Li & Peng Zhao*

*Corresponding author. Email: zhangcq@zju.edu.cn, pengzhao@zju.edu.cn

**The PDF file includes:**

Supplementary Note 1. The Material Selection and Preparation Method of Magnetic Skin.

Supplementary Note 2. Fabrication process of the magnetic film.

Supplementary Note 3. Magnetic flux densities of the magnetic film.

Supplementary Note 4. The consistent and symmetry response of the pressure applied to the magnetic skin

Supplementary Note 5. The experiment devices of pressure sensing performance section.

Supplementary Figure 1. The Micro-CT image and SEM image of 60% wt magnetic powder proportion.

Supplementary Figure 2. Six steps of magnetic skin fabrication.

Supplementary Figure 3. The magnetic simulation of the magnetic skin.

Supplementary Figure 4. Example indentation for approximate theory.

Supplementary Figure 5. The consistency test of the magnetic skin with region pressing.

Supplementary Figure 6. The consistency test of the magnetic skin with region pressing.

Supplementary Figure 7. The relationships between loading force (F) and z-direction magnetic flux density ().

Supplementary Figure 8. The experiment devices of pressure sensing performance section.

Supplementary Figure 9. The experiment devices of small-scale objects recognition section.

Supplementary Figure 10. The train process of small-scale objects recognition section.

Supplementary Figure 11. The experiment devices of large-scale objects recognition section.

Supplementary Figure 12. The corresponding By and Bz magnetic signals in six stages of two car control system.

**Other Supplementary Material for this manuscript includes the following:**

Supplementary Video 1. All region super-resolution perception.

Supplementary Video 2. Continuous pressing display.

Supplementary Video 3. Continuous pressing touch-board.

Supplementary Video 4. Multi-points sensing.

Supplementary Video 5. One car trajectory mapping.

Supplementary Video 6. Two cars trajectory mapping.

# Supplementary Note 1. The material selection and preparation method of magnetic skin

The magnetization of the composite *M* can be assumed proportional to the particle mass fraction for a uniformly magnetized homogeneous continuum1:

(S1)

where represents the magnetization factor of an individual particle .

The shear modulus of the material increases nonlinearly with the particle mass fraction. The nonlinear dependence can be expressed as2:

(S2)

which is known as the Mooney model for spherical particles with denoting the shear modulus of the material without magnetic particle.

According to our previous work1, after comparing the modulus of elasticity, ductility, hysteresis, and magnetic flux density strength of the six different magnetic powder proportions, it has been determined that the composition with 60% wt of magnetic powder exhibits the most desirable properties for the soft magnetic film. This proportion demonstrates a suitable balance between the material's elasticity, ductility, hysteresis characteristics, and magnetic flux density strength, making it the optimal choice for achieving the desired performance of the magnetic skin.

Based on the analysis of the magnetization and shear modulus relationship with magnetic particle mass fraction, as well as the stress-strain curve, hysteresis curve, and flux density graph of different magnetic particle mass fractions, the following typical magnetic materials have been selected: 60 wt% NdFeB microparticles (Jianghuai Ciye Corp), 13.93 wt%SE1700 base (Dow Corning Corp), 1.57 wt% SE1700 catalyst (Dow Corning Corp), 21.78% Ecoflex 00-30 Part B (Shanghai Zhixin Corp) and 2.72 wt% fumed silica nanoparticles (Aladdin Biochemistry Technology Corp). To adjust the rheological properties of the magnetic material, we incorporate fumed silica nanoparticles into the mixture. The mixing process is carried out using a planetary mixer (AR-100, THINKY Corp) at a speed of 2000 rpm for 3 minutes, followed by a deformation step at the same speed for 1 minute. Subsequently, the thoroughly blended magnetic material is poured into a prepared mold with a specific square size and then heated in an oven at 120°C for 1 hour. The SE 1700 catalyst is employed to facilitate the complete curing of the materials during the heating process. Finally, the fabricated magnetic plate undergoes magnetization using a high-intensity magnetic field of 1.8T generated by a magnetizer, enabling the programming of the magnetic polarities of the NdFeB microparticles.

**Supplementary Note 2. Fabrication process of the magnetic film**

The production process of the magnetic skin involves six steps as shown in Figure S2: First, fix 16 magnetic Hall sensors (MLX90393; Melexis) in the specified positions on the base. Place the base fixture of the magnetic skin directly above the sensors and pour Ecoflex 00-30 AB resin. Use a mold with 25 compartments to allow the silicone to solidify, creating 25 square cavities. Attach pre-magnetized flexible magnetic films into the 25 cavities. Finally, pour Ecoflex 00-30 AB resin on top to integrate the components into a unified structure.

**Supplementary Note 3. Magnetic flux densities of the magnetic film**

We use the inverse cubic relationship to estimate the magnetic field strengths changing with distance1,3:

. (S3)

The magnetic skin can be divided into blocks, where each individual unit is equivalent to our previous work. One of the measurement center points of the Hall sensor remains in a contact-free state and is positioned 30 mm below the center of the four magnetic films. The sensing directions Bx, By, and Bz are depicted in Figure S4. We specifically focus on the pressing point at the upper left corner, while noting that the results for the other three corners can be easily obtained through coordinate symmetric transformations. In the case of the pressing point at the upper left corner, we define the distances dx and dy to the sensing point as illustrated in Figure S4, and the pressing depth as dz. (Throughout the pressing process, we assume the movement of a point solely in the z direction.)

Initially, the magnetic elastomer remains undeformed. We consider the pressing point on the magnetic elastomer located at a fixed distance from the Hall sensor. The pressing point possesses its own initial magnetic field, denoted as , which is generated based on the specific magnetization direction mentioned earlier4:

(S4)

We can write the distance r as a function of our dx, dy and axes:

(S5)

After the pressing process, the pressing point undergoes a downward movement by a distance of dz. As a result, the magnetic flux density experienced by the Hall sensor undergoes a change, which can be described as the subtraction of two vectors:

(S6)

where is the initial height of the pressing point. For a given force applied by a cylindrical squeeze head in a 3D printing process, the depth of indentation from the surface of the elastomer can be estimated as follows:

(S7)

where F is the force applied, is the poison ratio of the material, E is the Young’s modulus of the material, and is the radius of the cylindrical squeeze head. Putting above equation into (S5), we can get:

(S8)

Using simple coordinate transformation, we can get the x, y and z directions of magnetic flux density on other three regions. This formula is also applicable to each sensor within the sensor array.

**Supplementary Note 4. The consistent and symmetry response of the pressure applied to the magnetic skin**

Because the magnetic skin is composed of 25 uniformly magnetized and symmetrically arranged small magnetic films, we aim to investigate the consistency of the pressure signals across the entire magnetic skin. We divide the magnetic skin into 25 regions, as shown in Figure S5. By comparing the 12-dimensional pressure magnetic field signals from the four surrounding sensors of 9 pressure points in regions 7 and 13 (as shown in Figure S5), as well as in regions 12 and 18 (as shown in Figure S6), we can observe that the magnetic skin exhibits excellent signal pressure consistency, the ratios of the pressure signals in each dimension across the 9 pressure points remain relatively consistent.

# Supplementary Note 5. The experiment devices of pressure sensing performance section

The force gauge (Zhiqu, DS2-50N) is controlled by the electric drive XYZ three-dimensional platform (PMS-3) to measure the contact force of the magnetic film. We can know the X,Y coordinate location and depth information from the control program of the electric drive XYZ three-dimensional platform (PMS-3). Because most parts of electric drive XYZ three-dimensional platform (PMS-3) are made by aluminum, the movements of it doesn’t affect the magnetic signals received by the Hall sensor (MLX90393) (Figure S8).


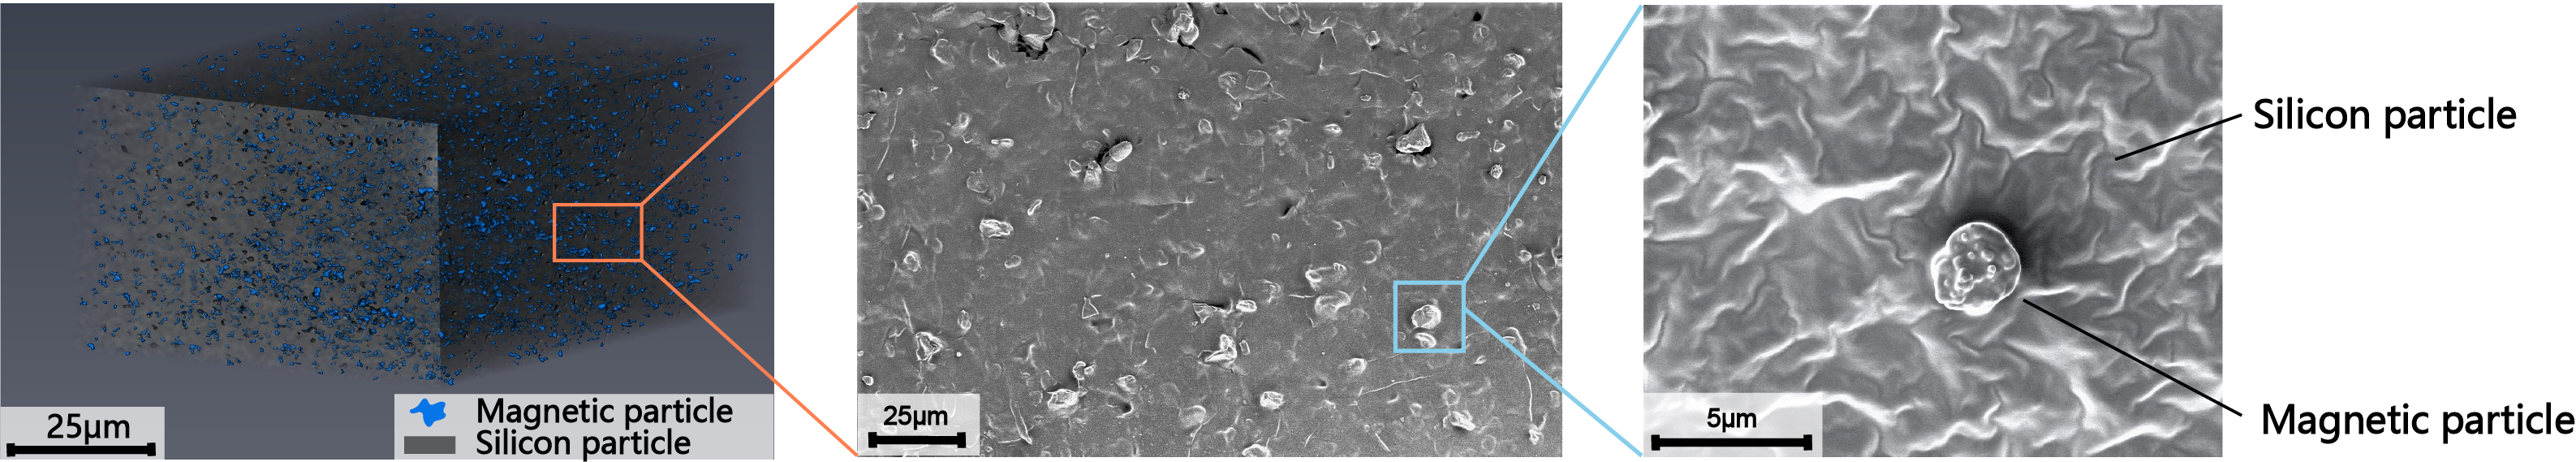


**Supplementary** Figure 1. The Micro-CT image and SEM image of 60% wt magnetic powder proportion. The magnetic powder is uniformly distributed within silicone particle, with a particle size of around five micrometers.


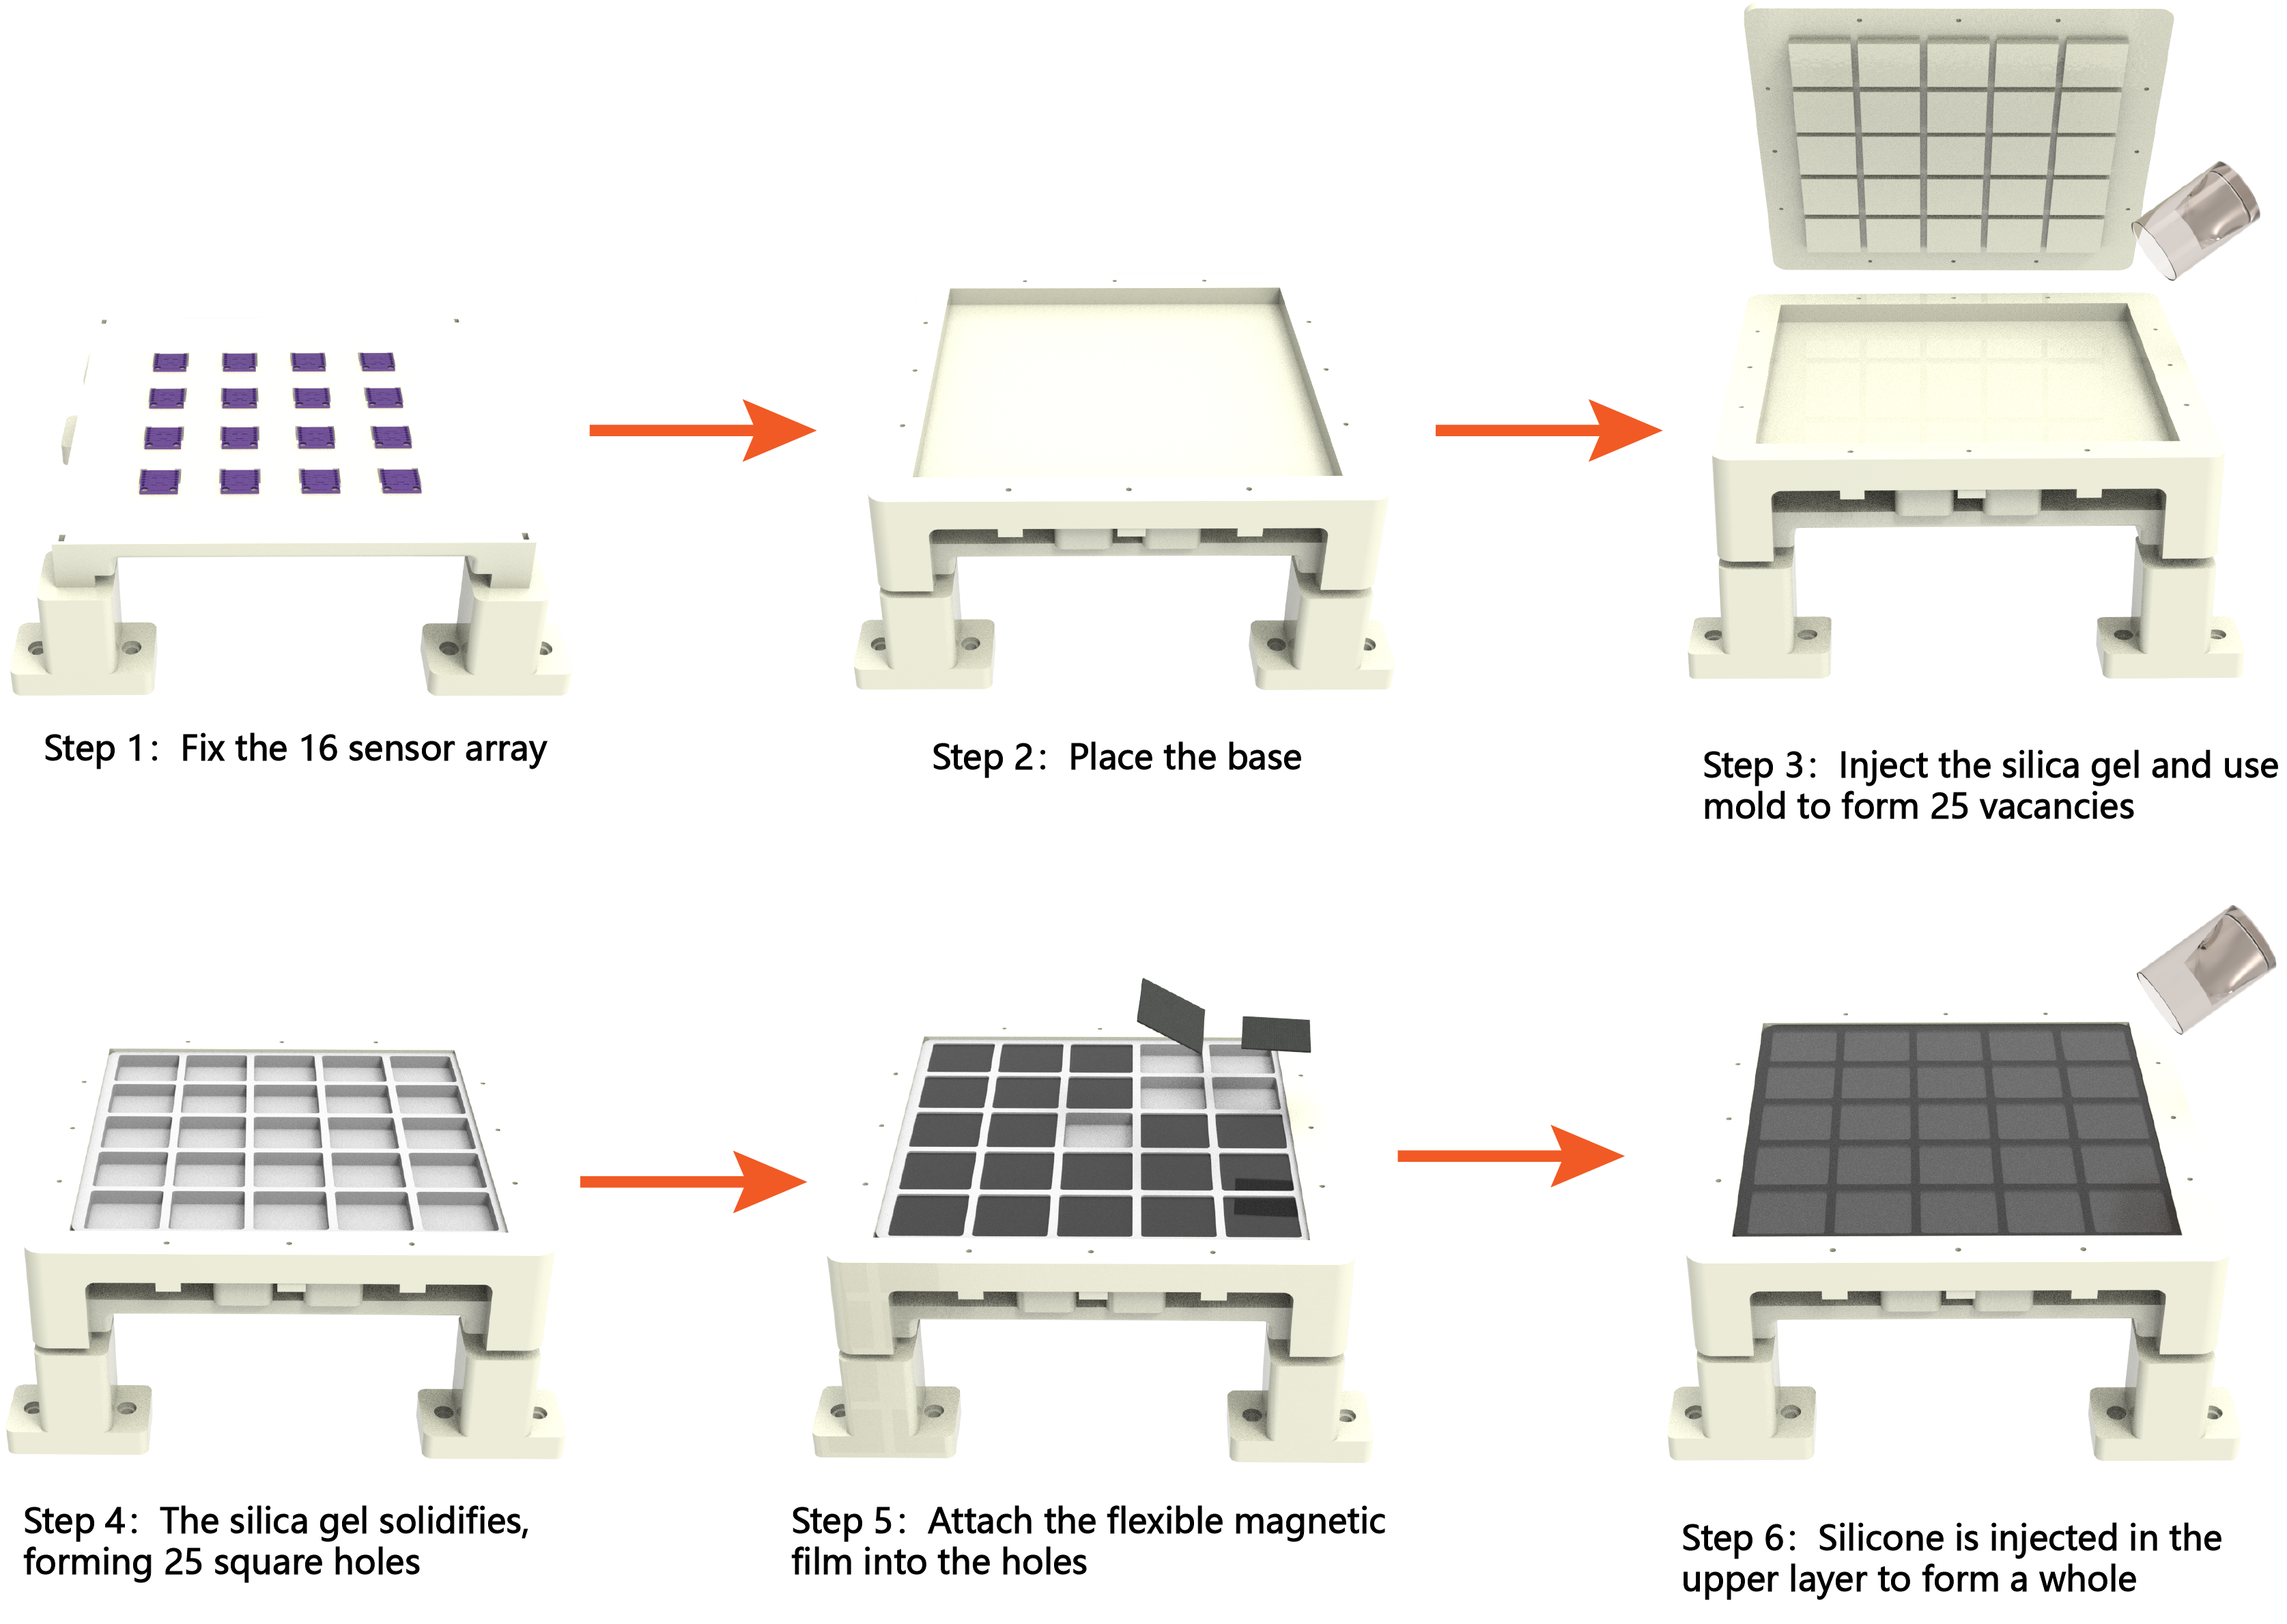


**Supplementary** Figure 2. Six steps of magnetic skin fabrication.First, the array of 16 sensors is fixed onto a base plate. Then, the base of the magnetic skin is secured directly above the sensor array. Ecoflex 00-30 AB adhesive is poured and a mold is used to create 25 specified cavities. Once the adhesive is cured, the 25 pre-fabricated and magnetized flexible magnetic pieces are placed into the respective cavities. Silicone gel is then injected from the top to form a unified structure.


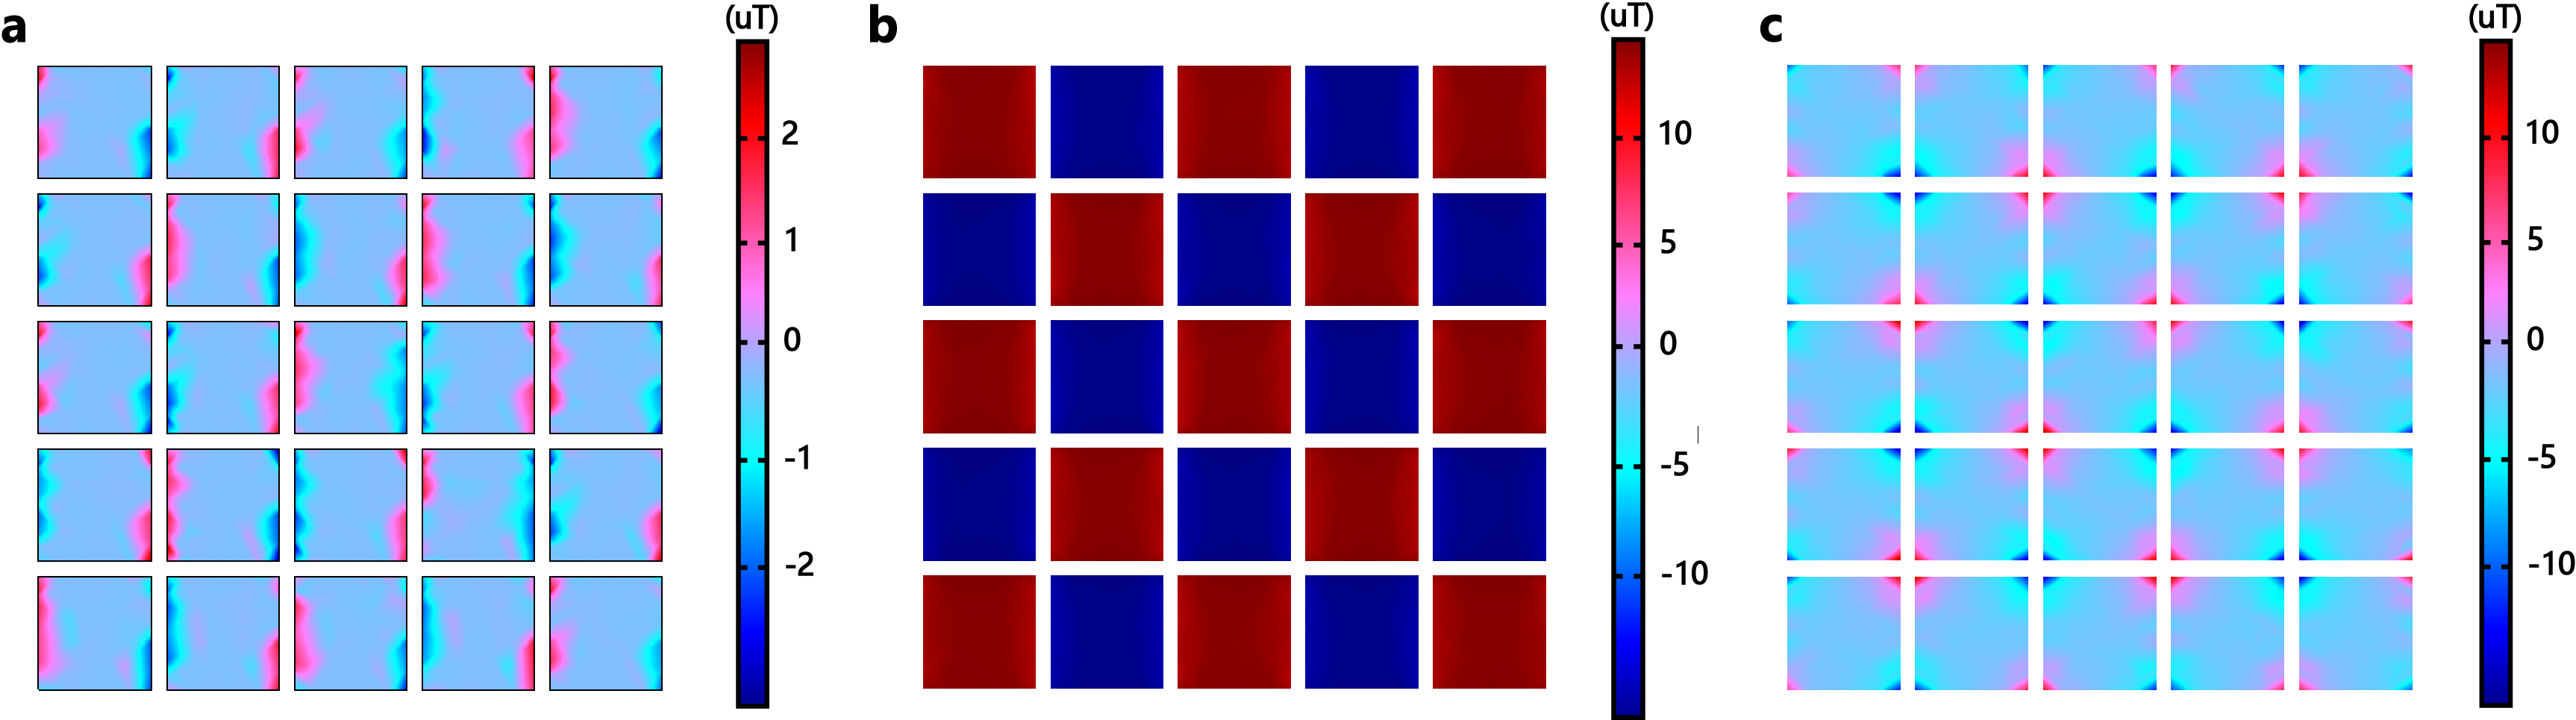


**Supplementary** Figure 3. The magnetic simulation of the magnetic skin. **a** Simulation of x-direction (Bx) magnetic flux density; **b** Simulation of y-direction (By) magnetic flux density; **c** Simulation of z-direction (Bz) magnetic flux density.


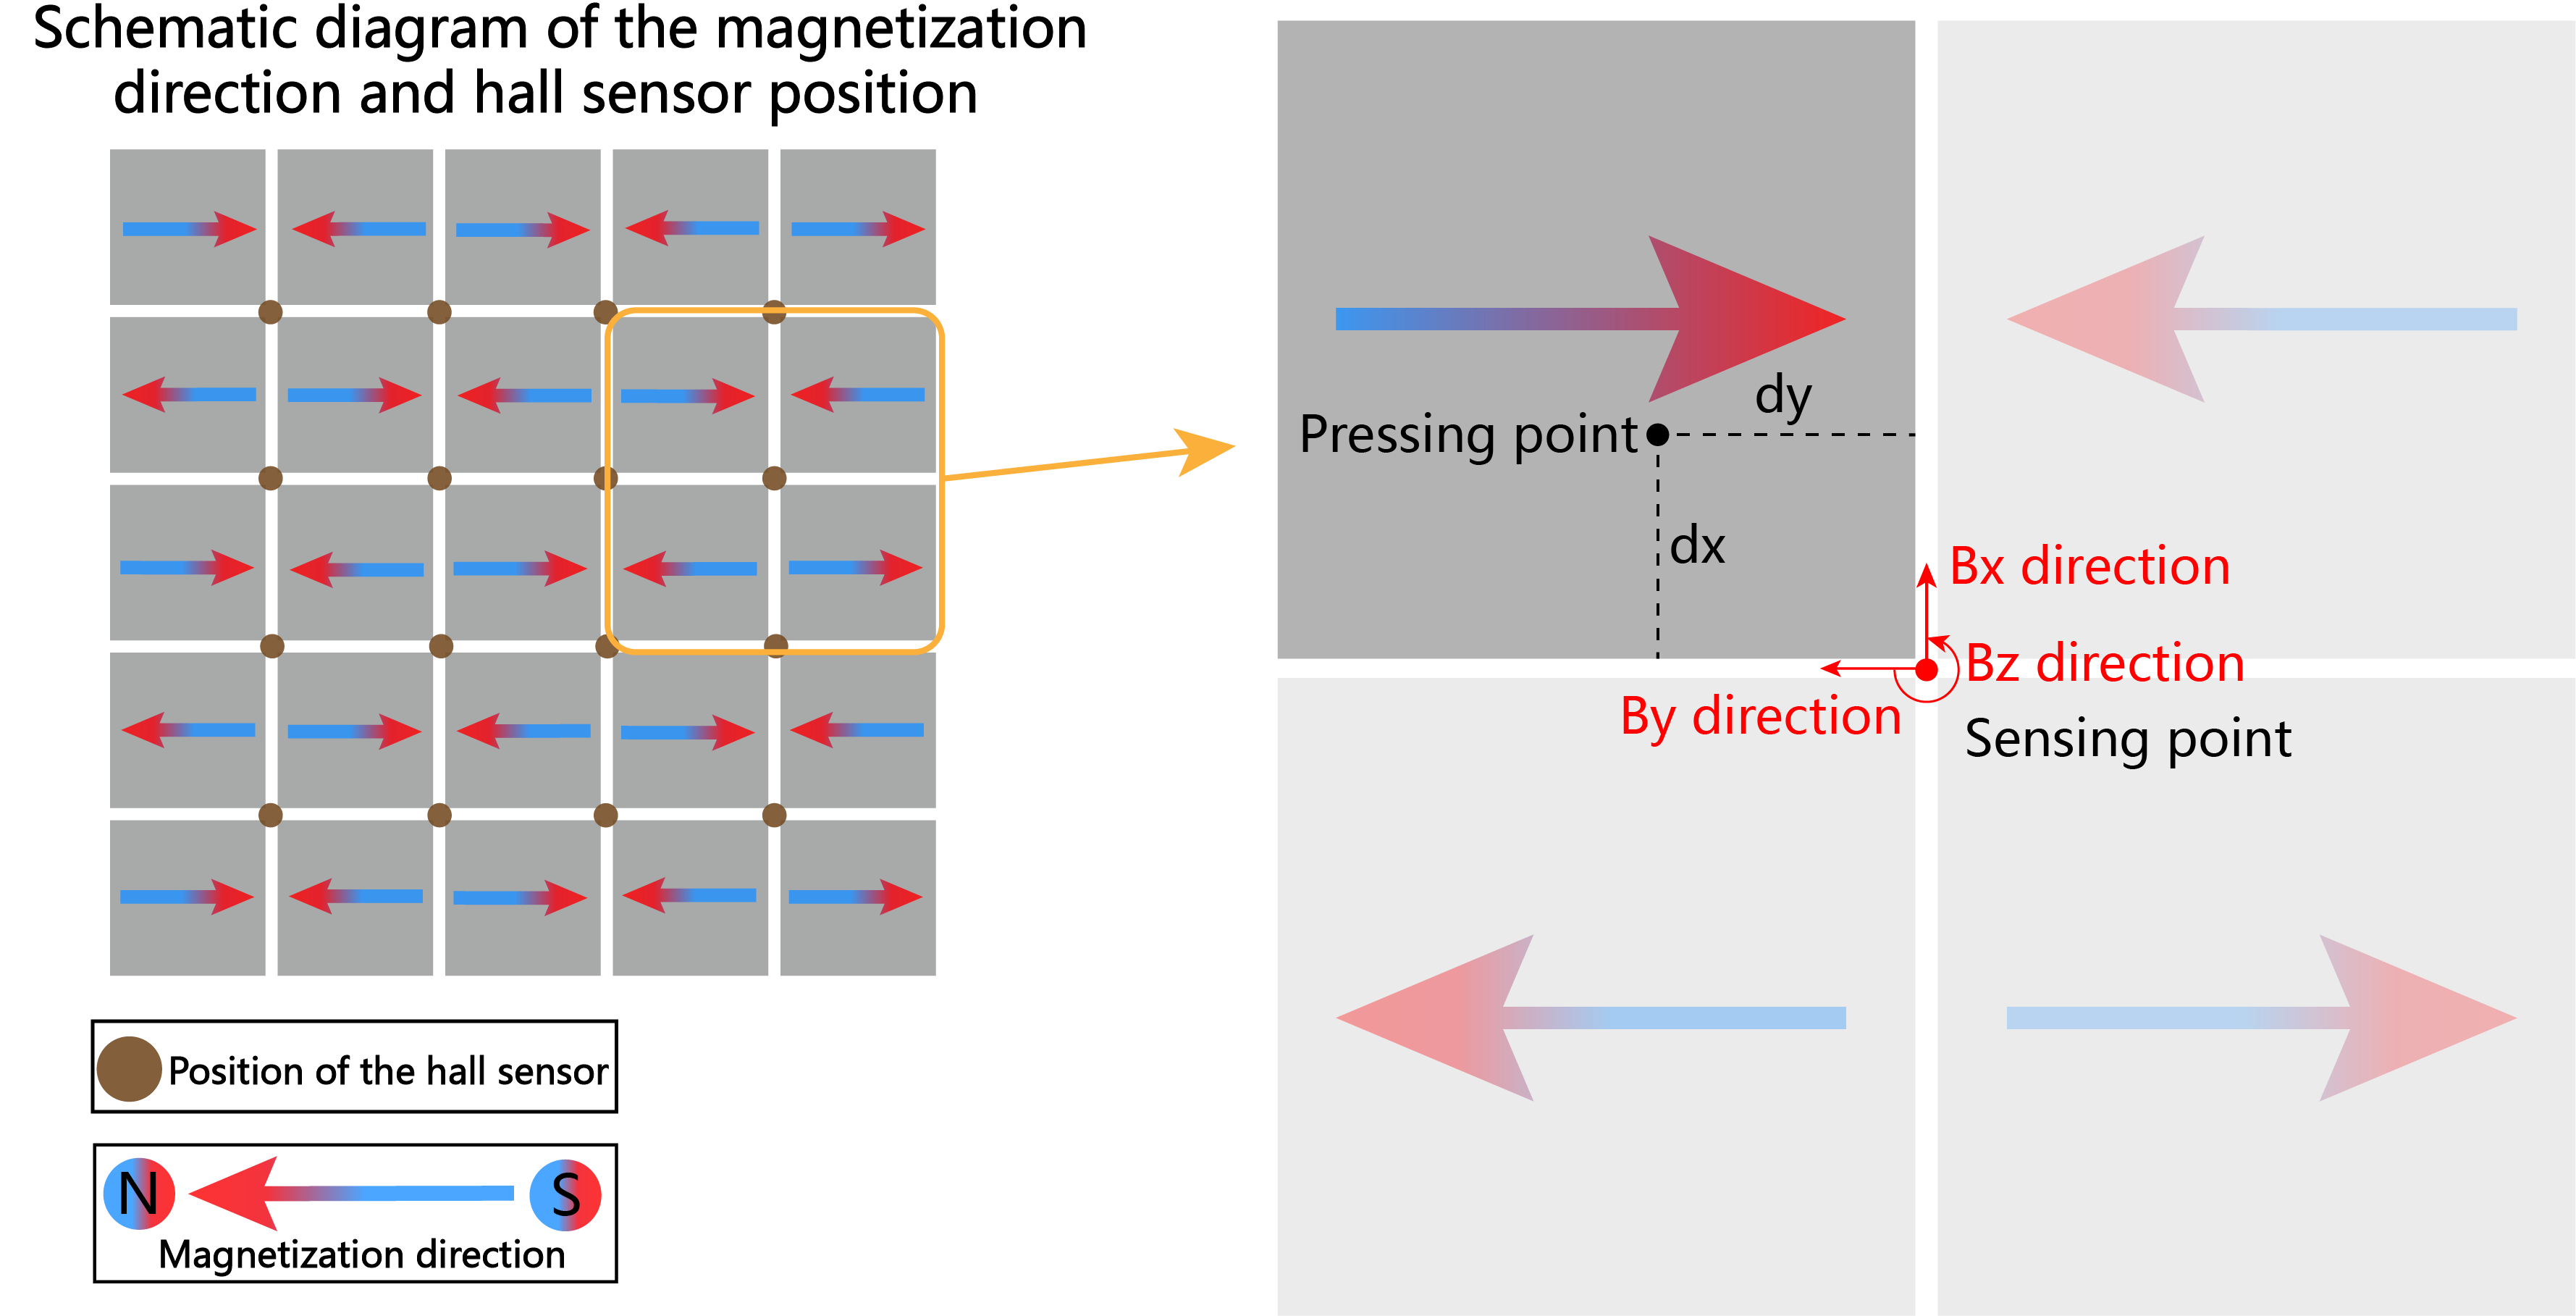


**Supplementary** Figure 4. **Example indentation for approximate theory.**


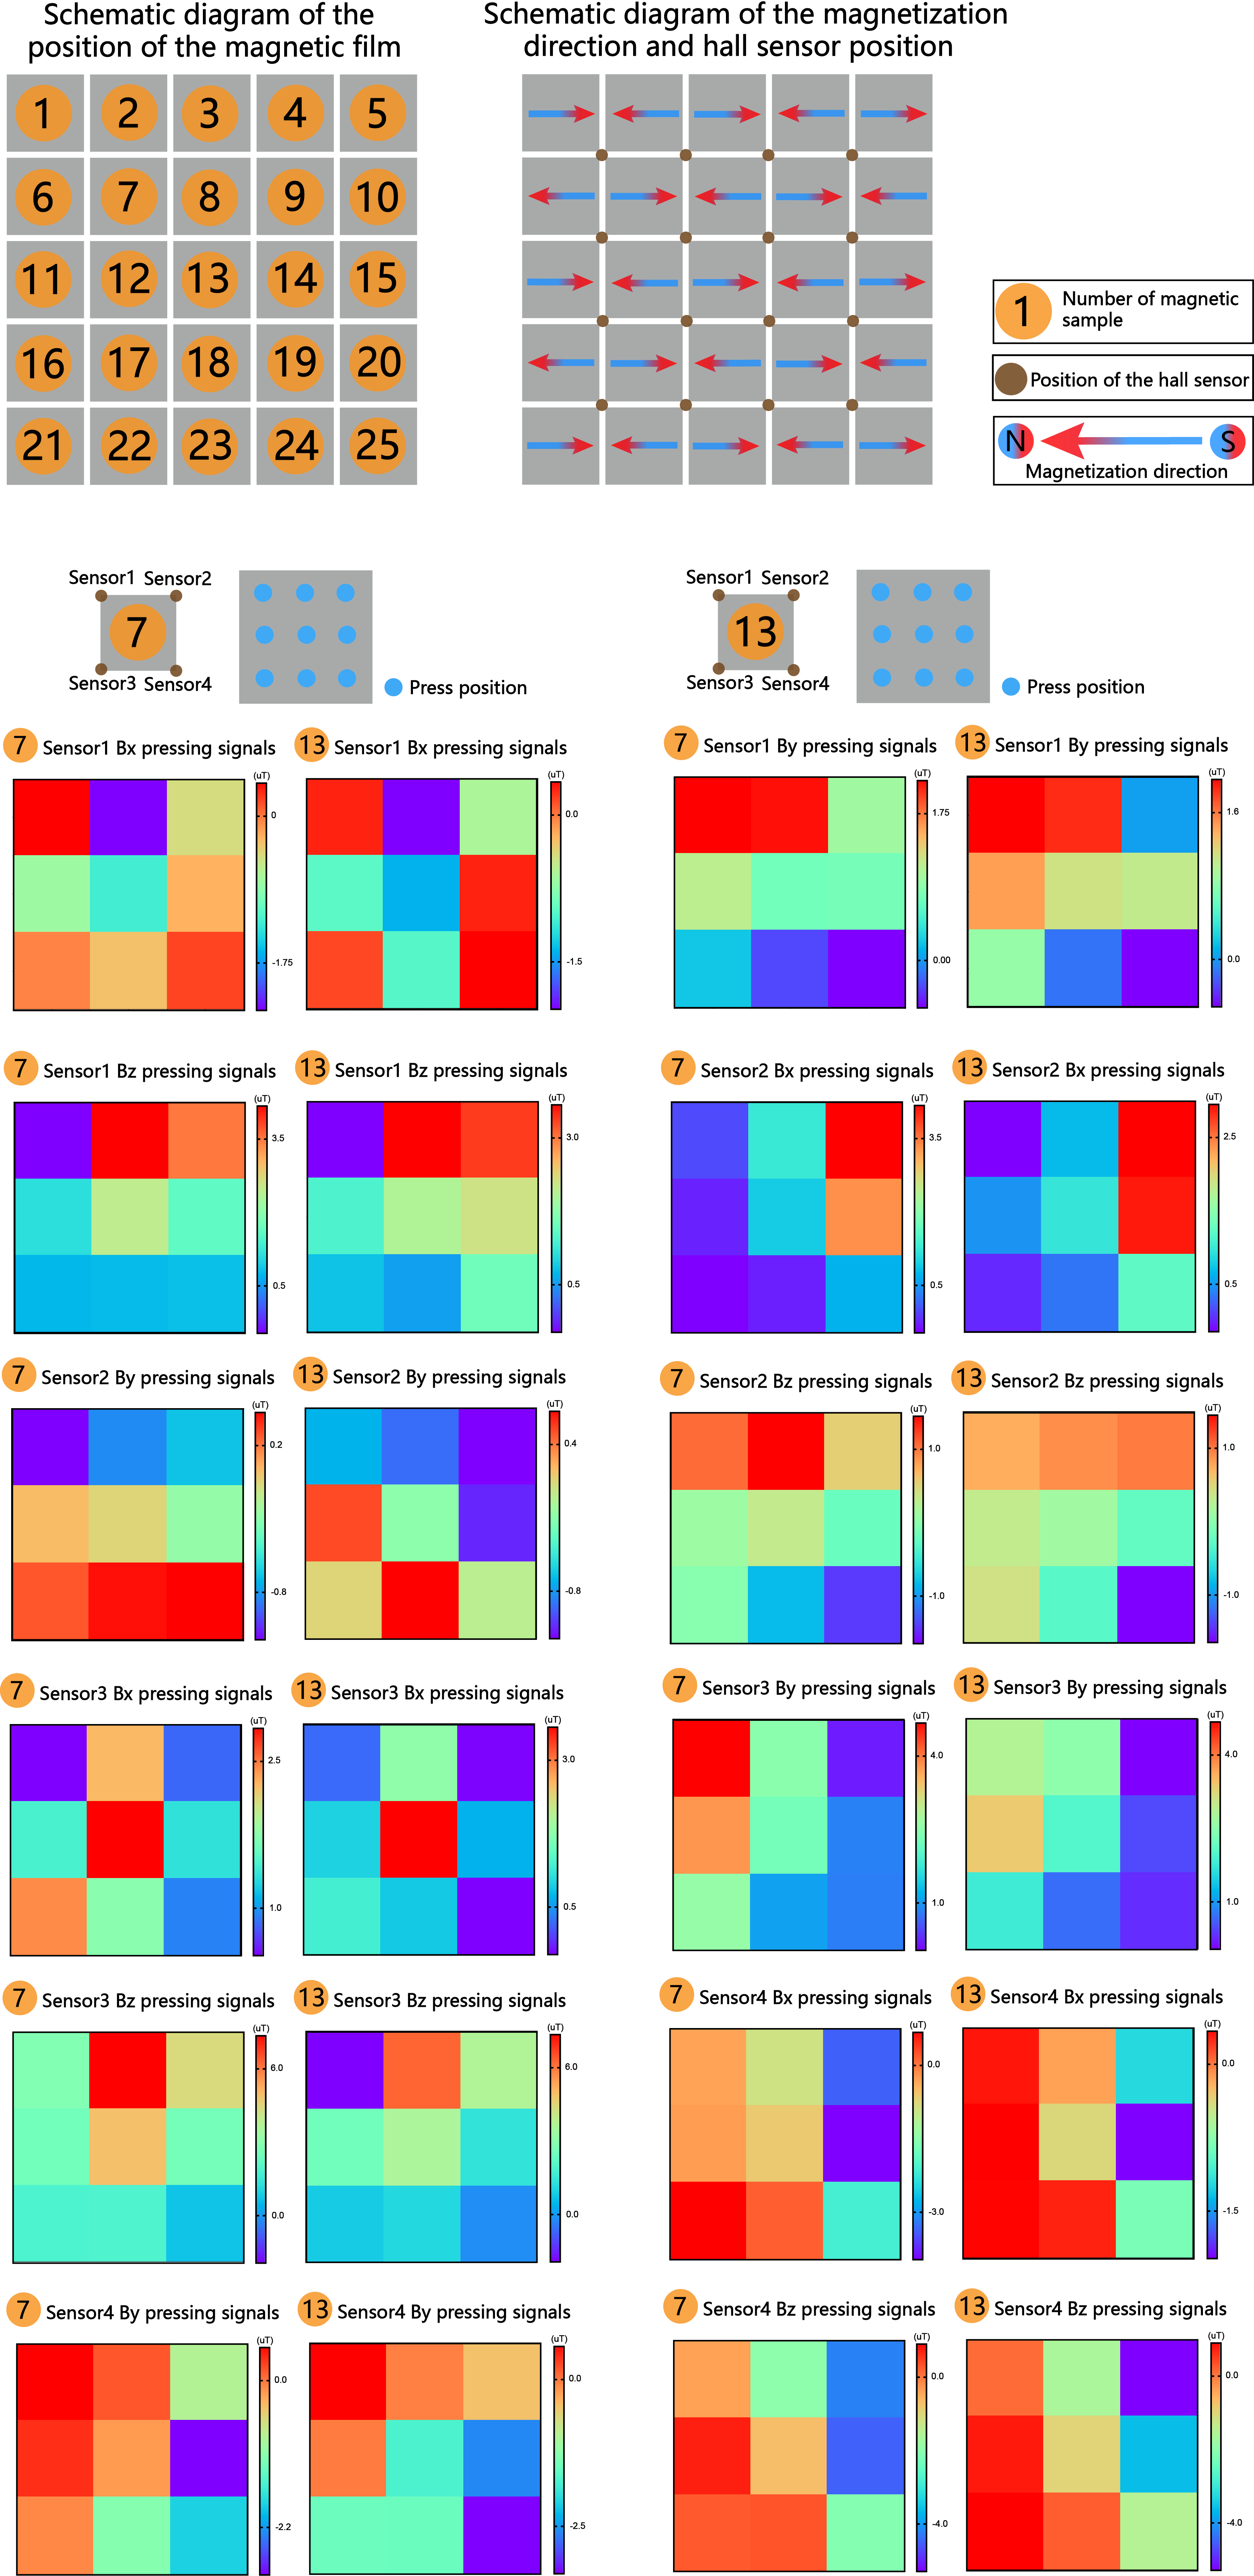


**Supplementary** Figure 5. The consistency test of the magnetic skin with region pressing. Comparing the pressing signal results in region 7 and 13 in the magnetic skin.


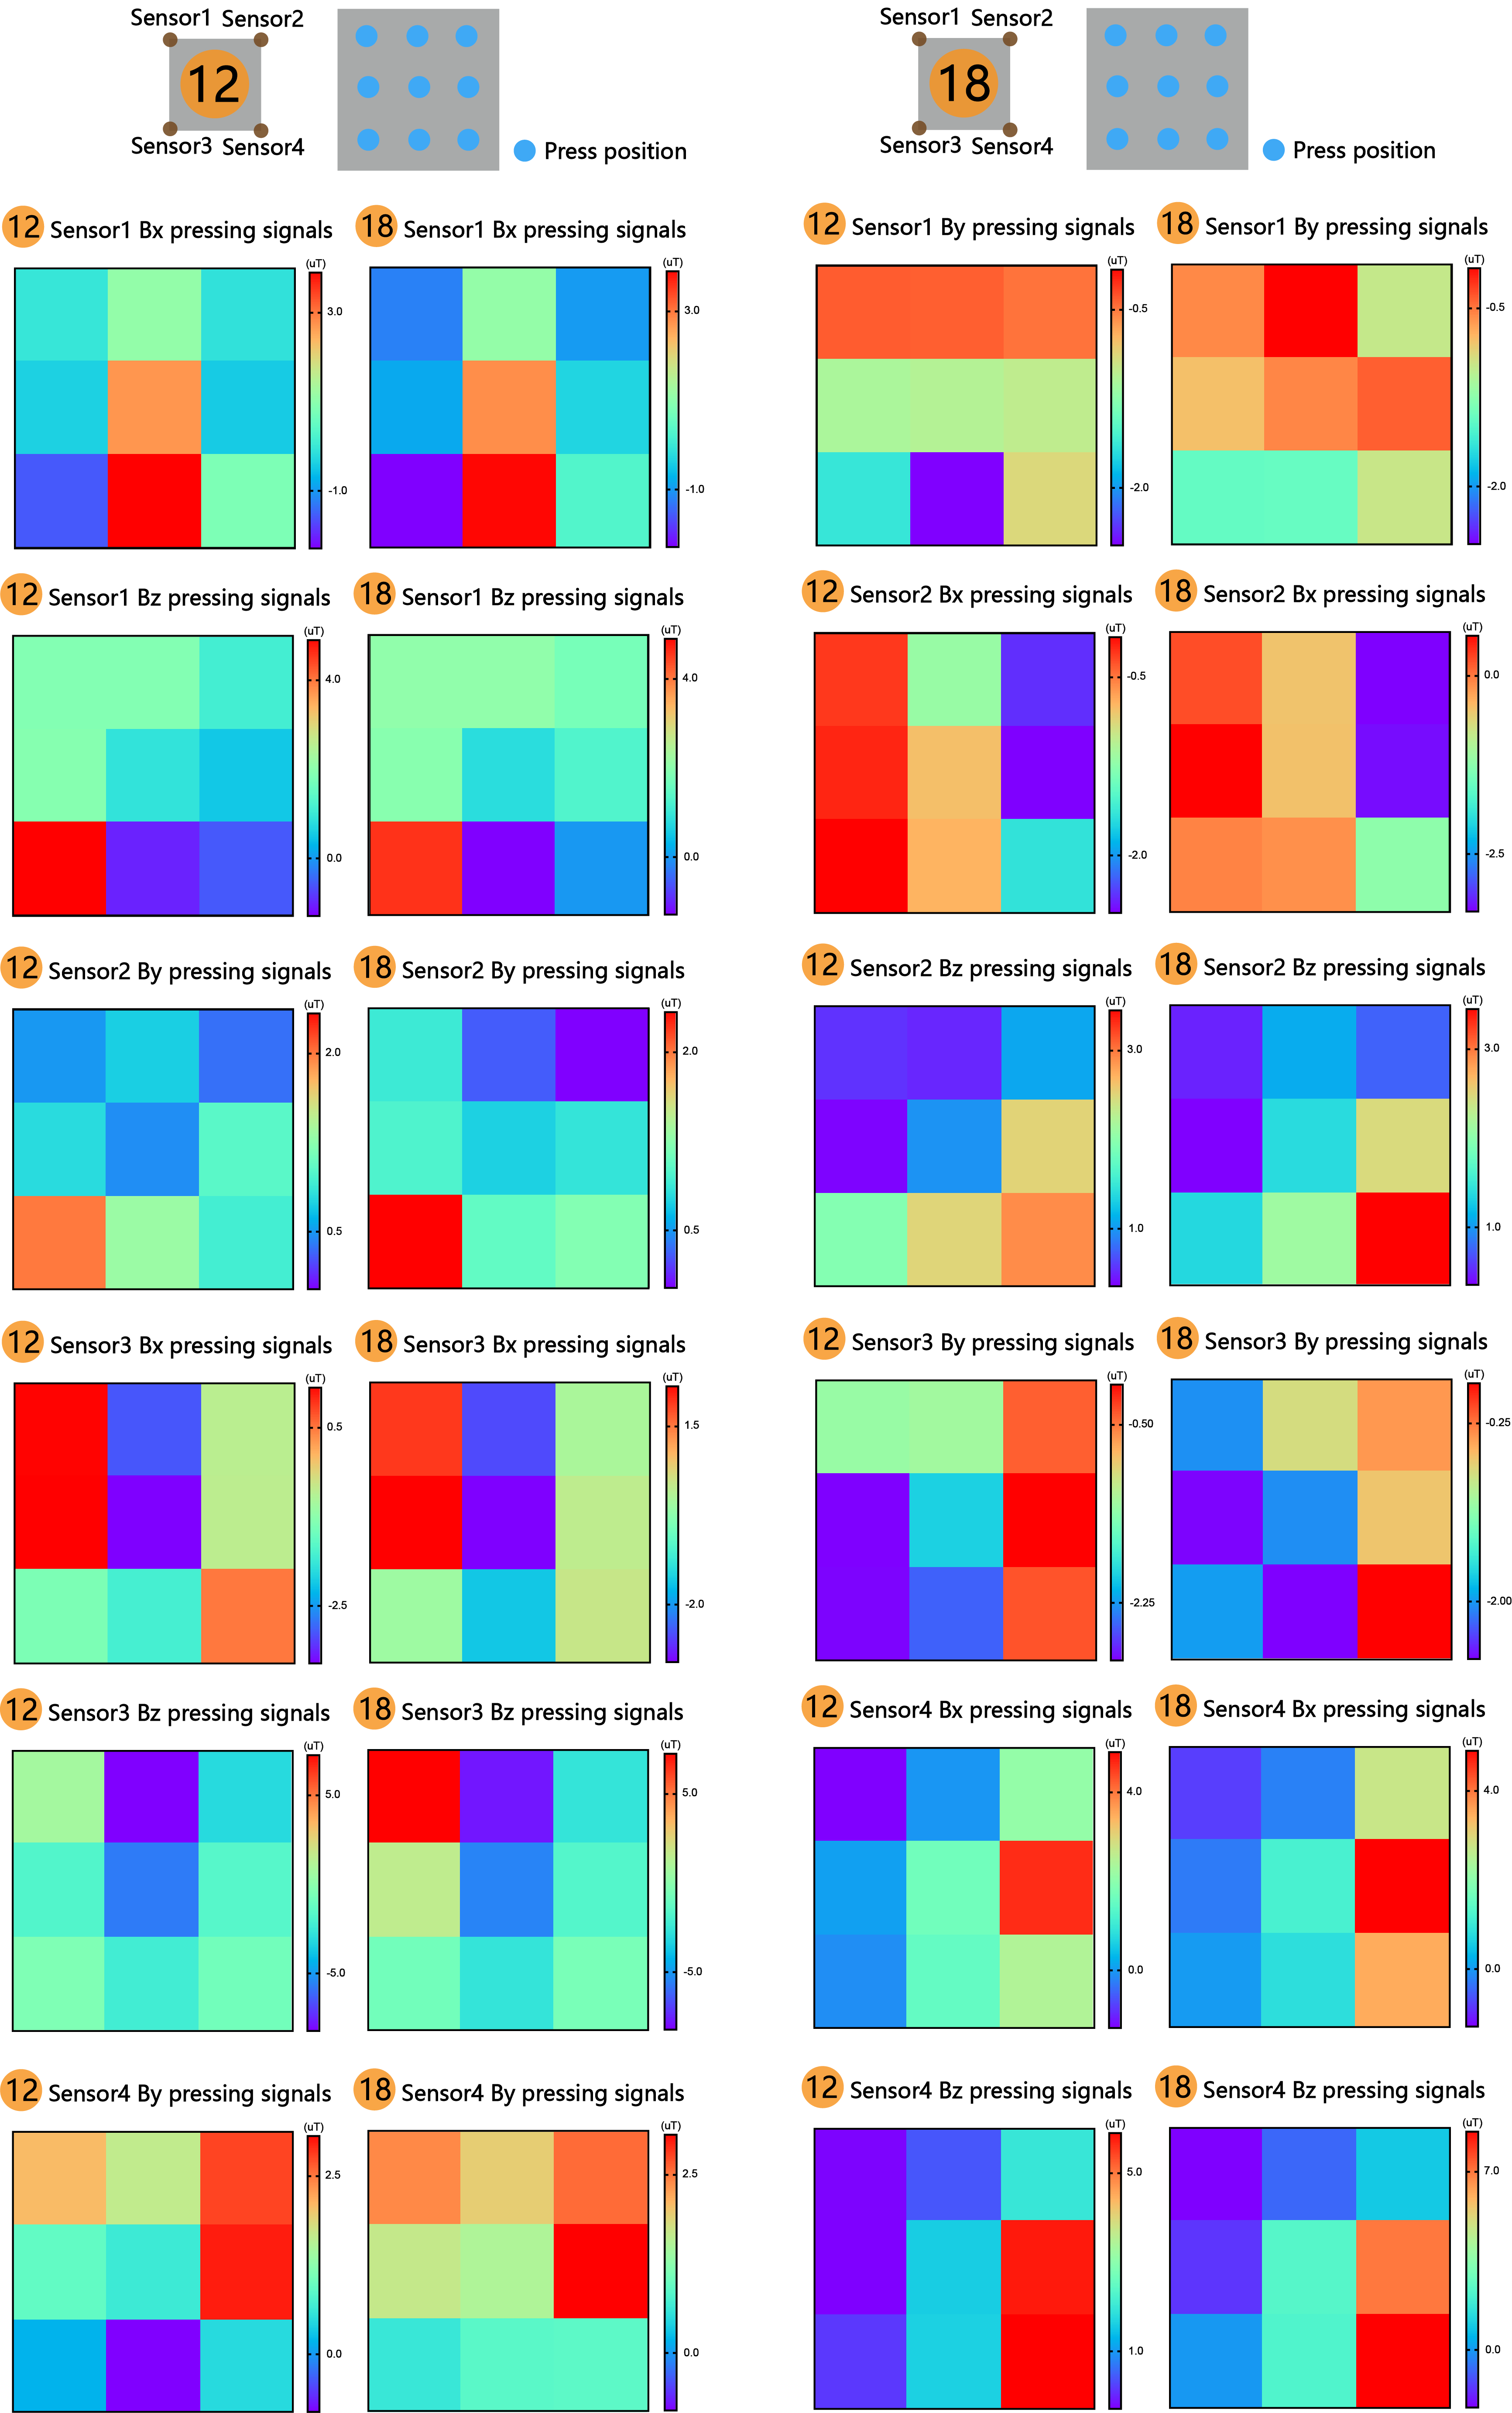


**Supplementary** Figure 6. The consistency test of the magnetic skin with region pressing. Comparing the pressing signal results in region 12 and 18 in the magnetic skin.


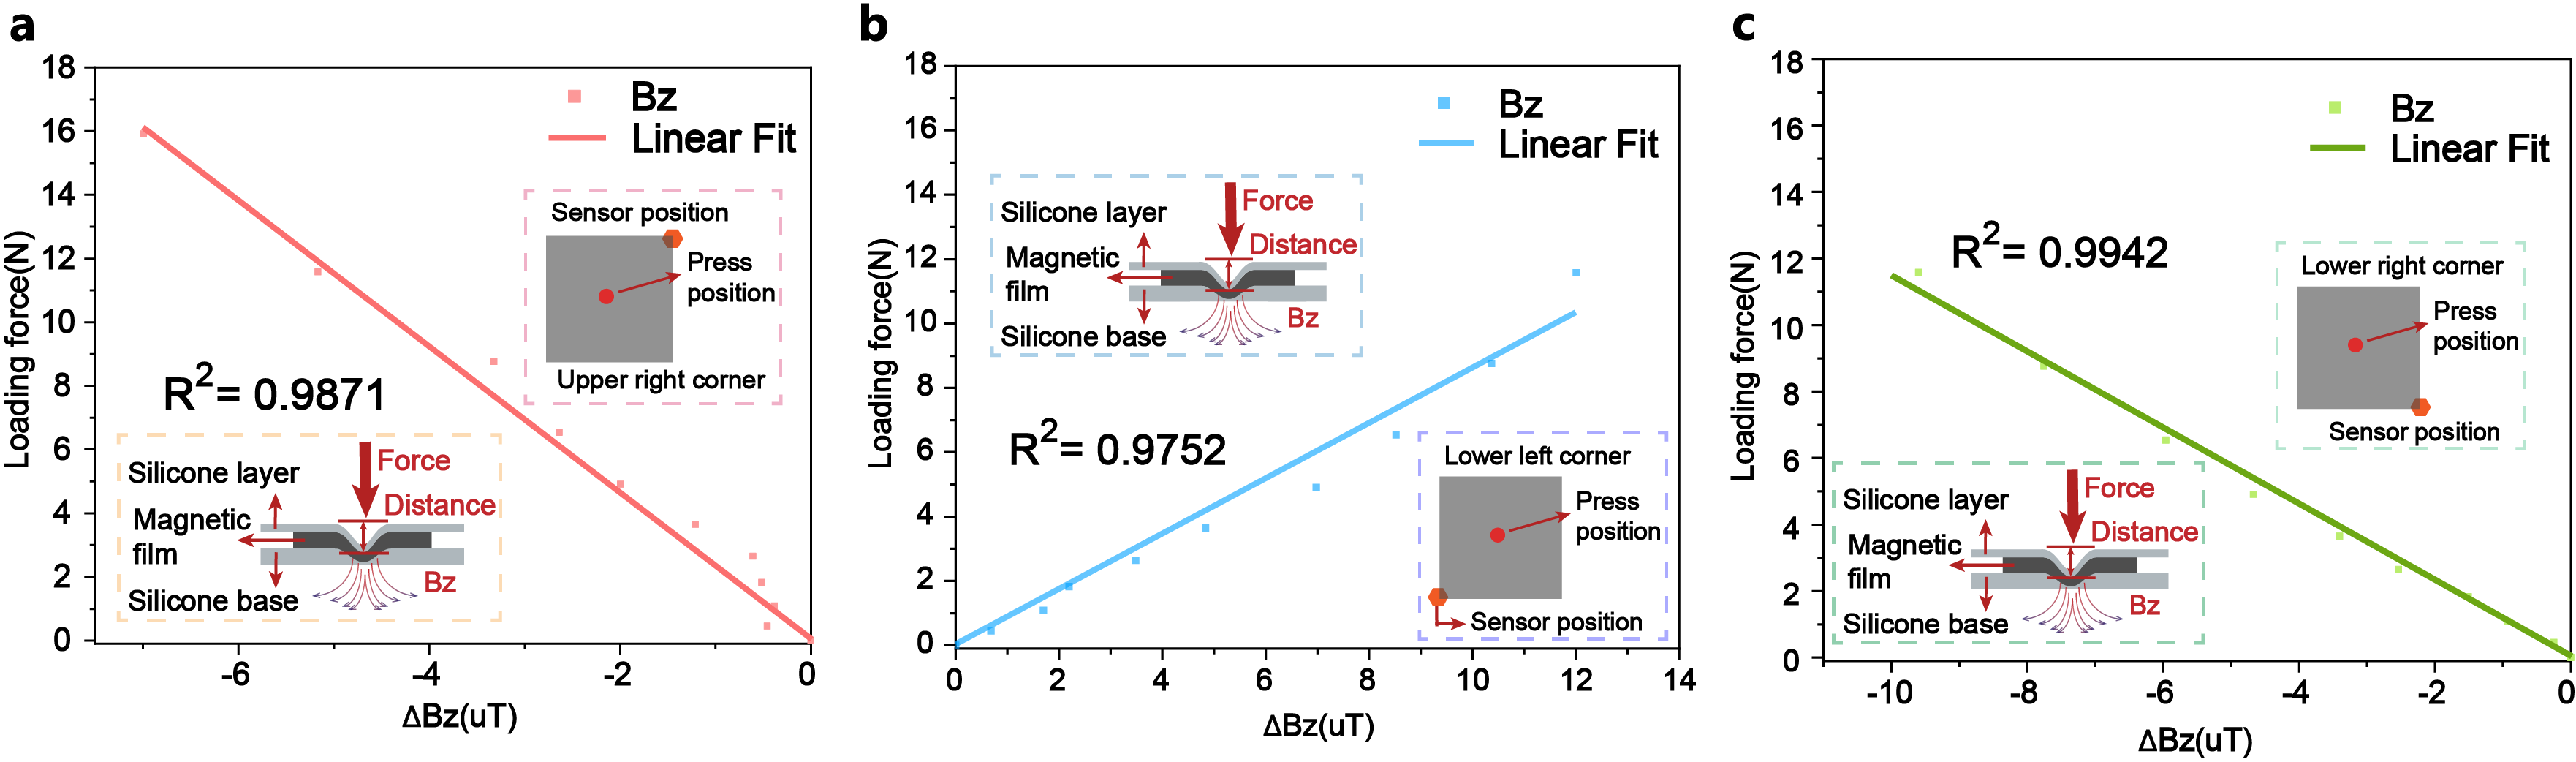


**Supplementary** Figure 7. **The relationships between** **loading force (F) and z-direction magnetic flux density (****).** **a** Signal of nearby right-up Hall sensor; **b** Signal of nearby left-lower Hall sensor; **c** Signal of nearby right-lower Hall sensor.


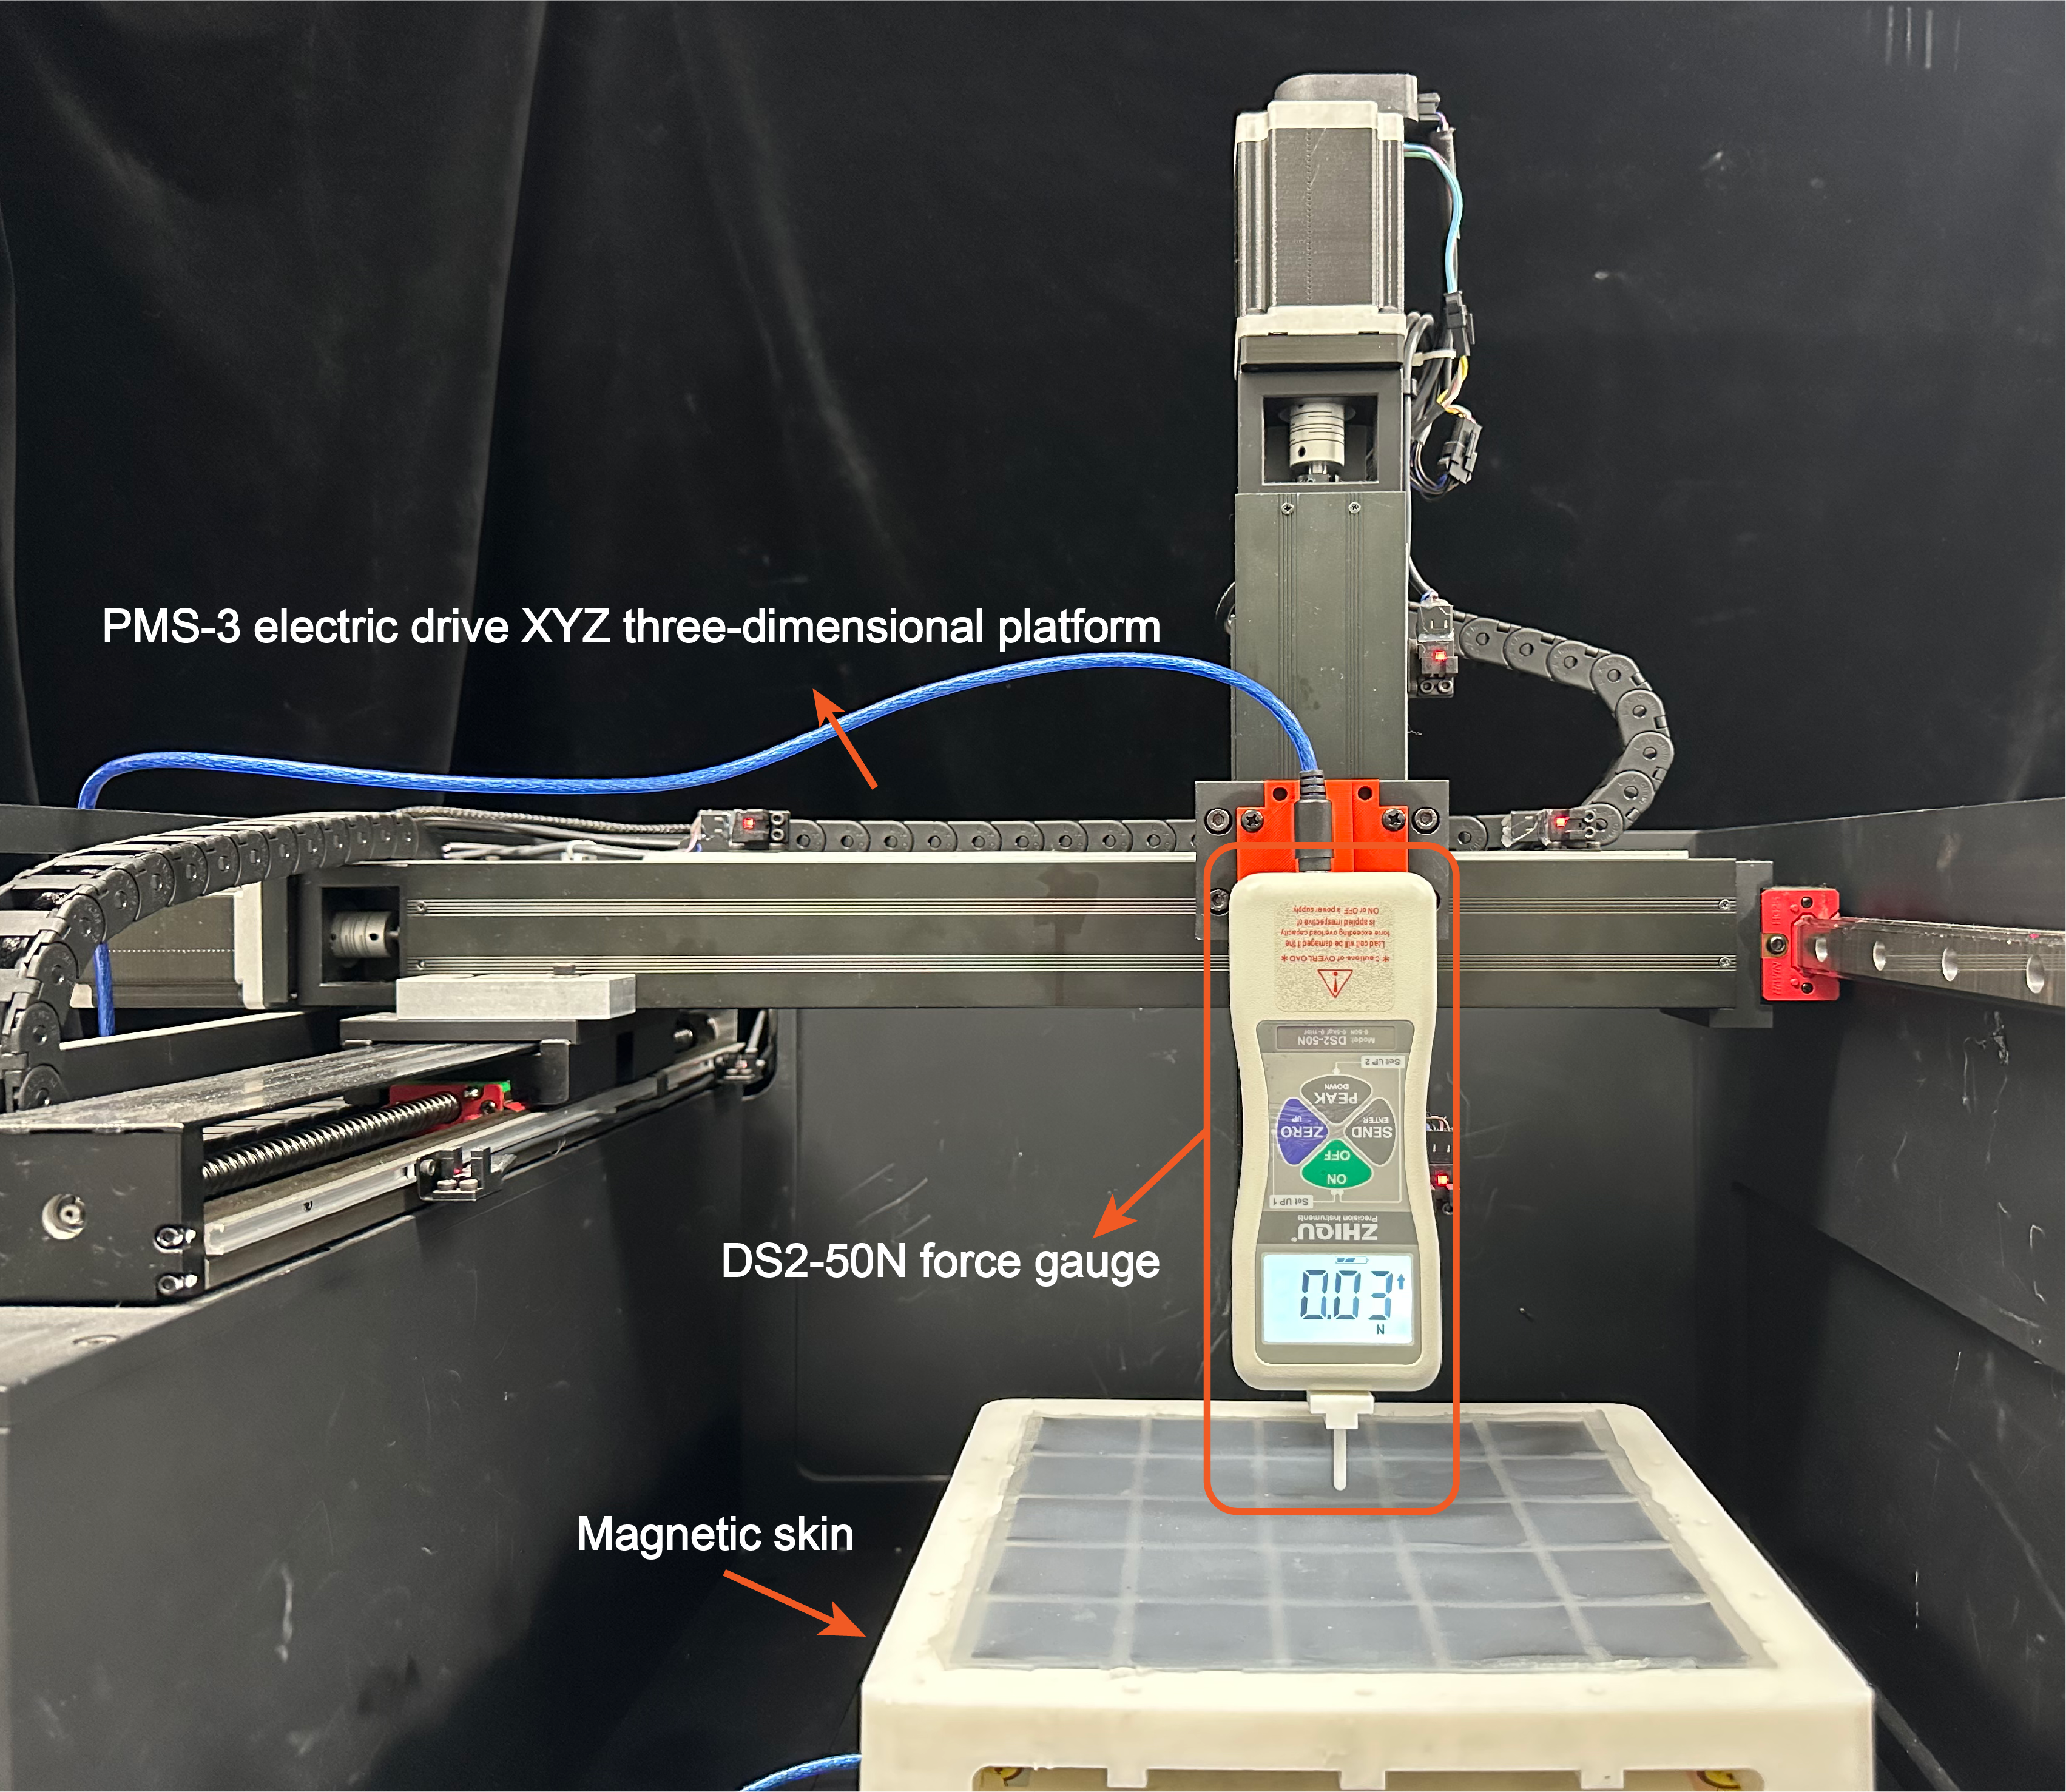


**Supplementary** Figure 8. **The experiment devices of pressure sensing performance section.** Motorized 3D linear stage is equipped with a force gauge with an indenter.


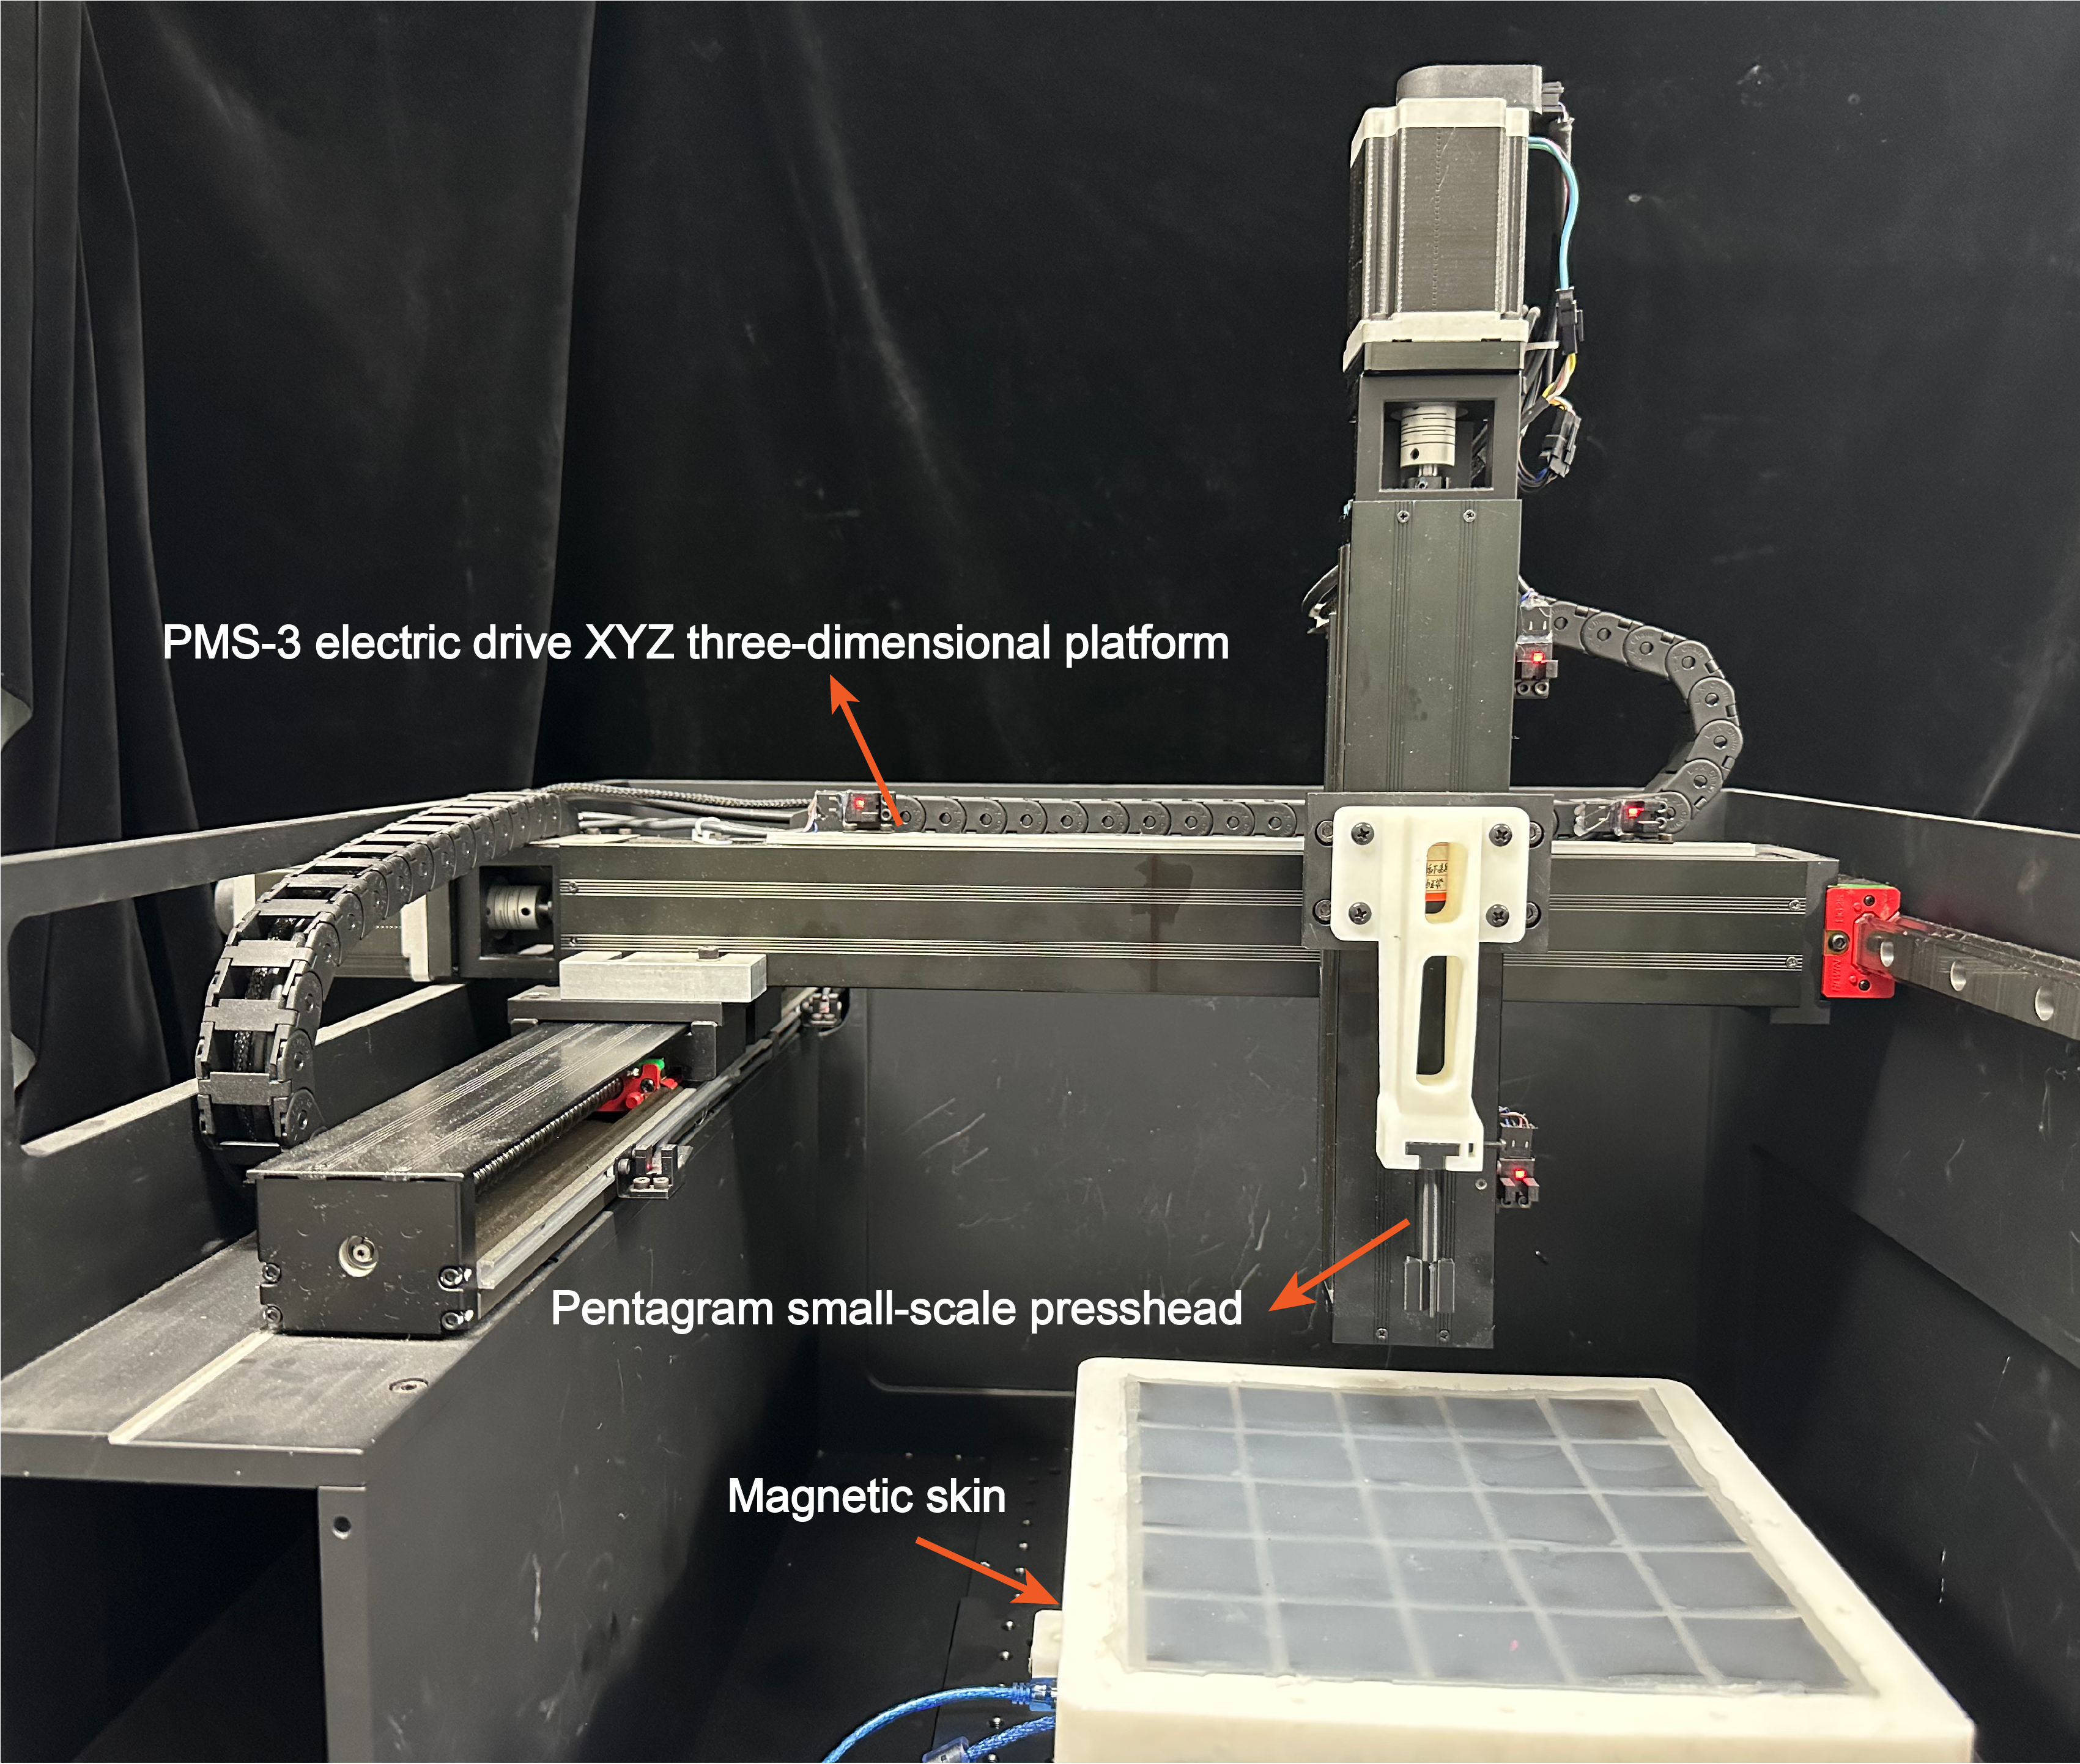


**Supplementary** Figure 9. **The experiment devices of small-scale objects recognition section.** Motorized 3D linear stage is equipped with a fixed device which can change the different press head.


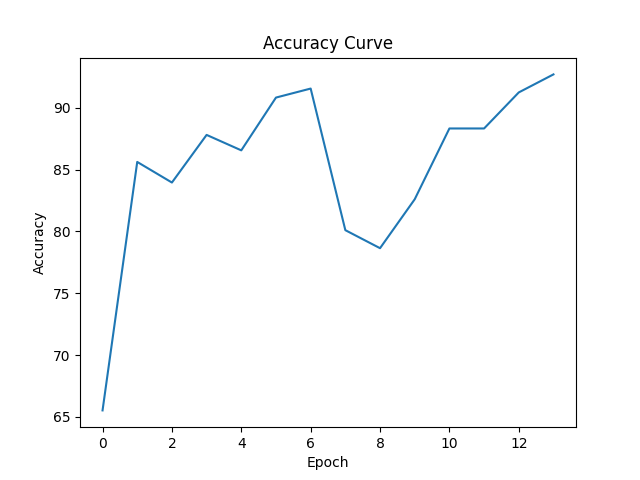

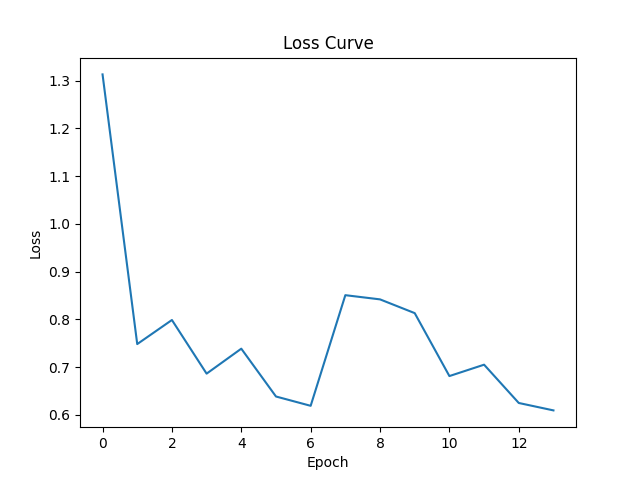


**Supplementary** Figure 10. **The train process of small-scale objects recognition section.**


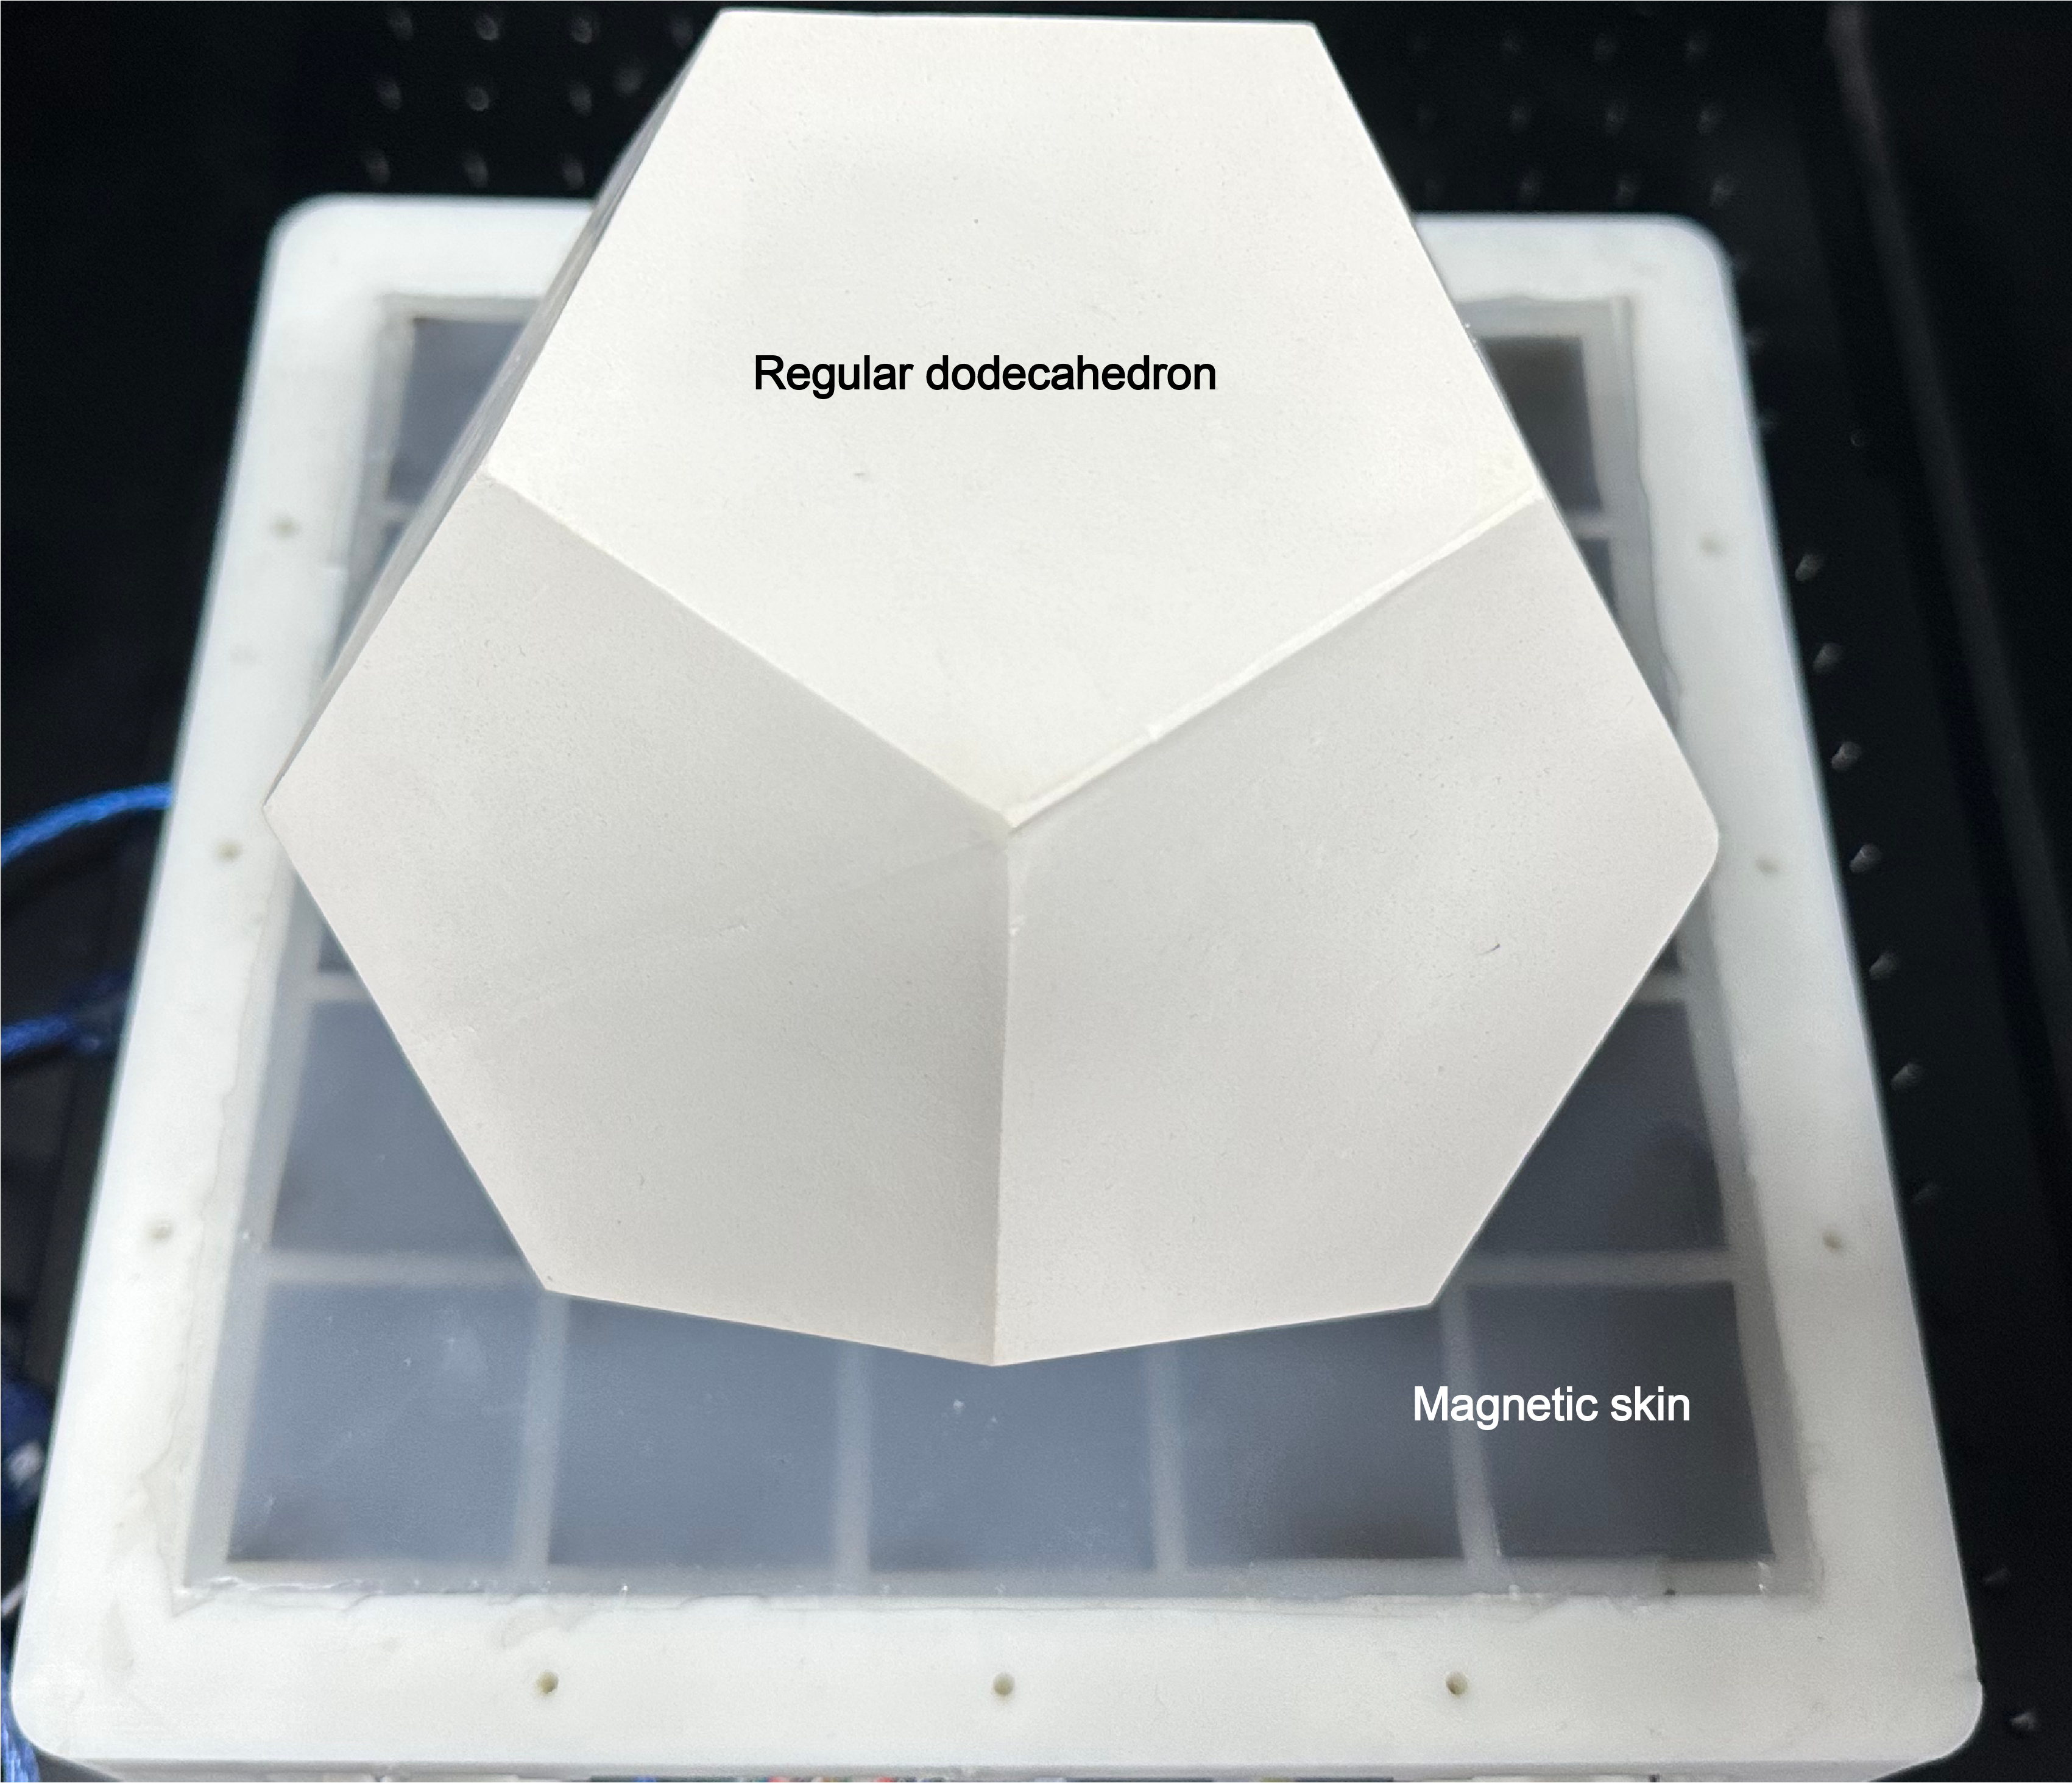


**Supplementary** Figure 11. **The experiment devices of large-scale objects recognition section.** Different shapes of large-scale pressing heads are placed at the center of the magnetic skin to perform pressing and obtain the corresponding pressing signals.


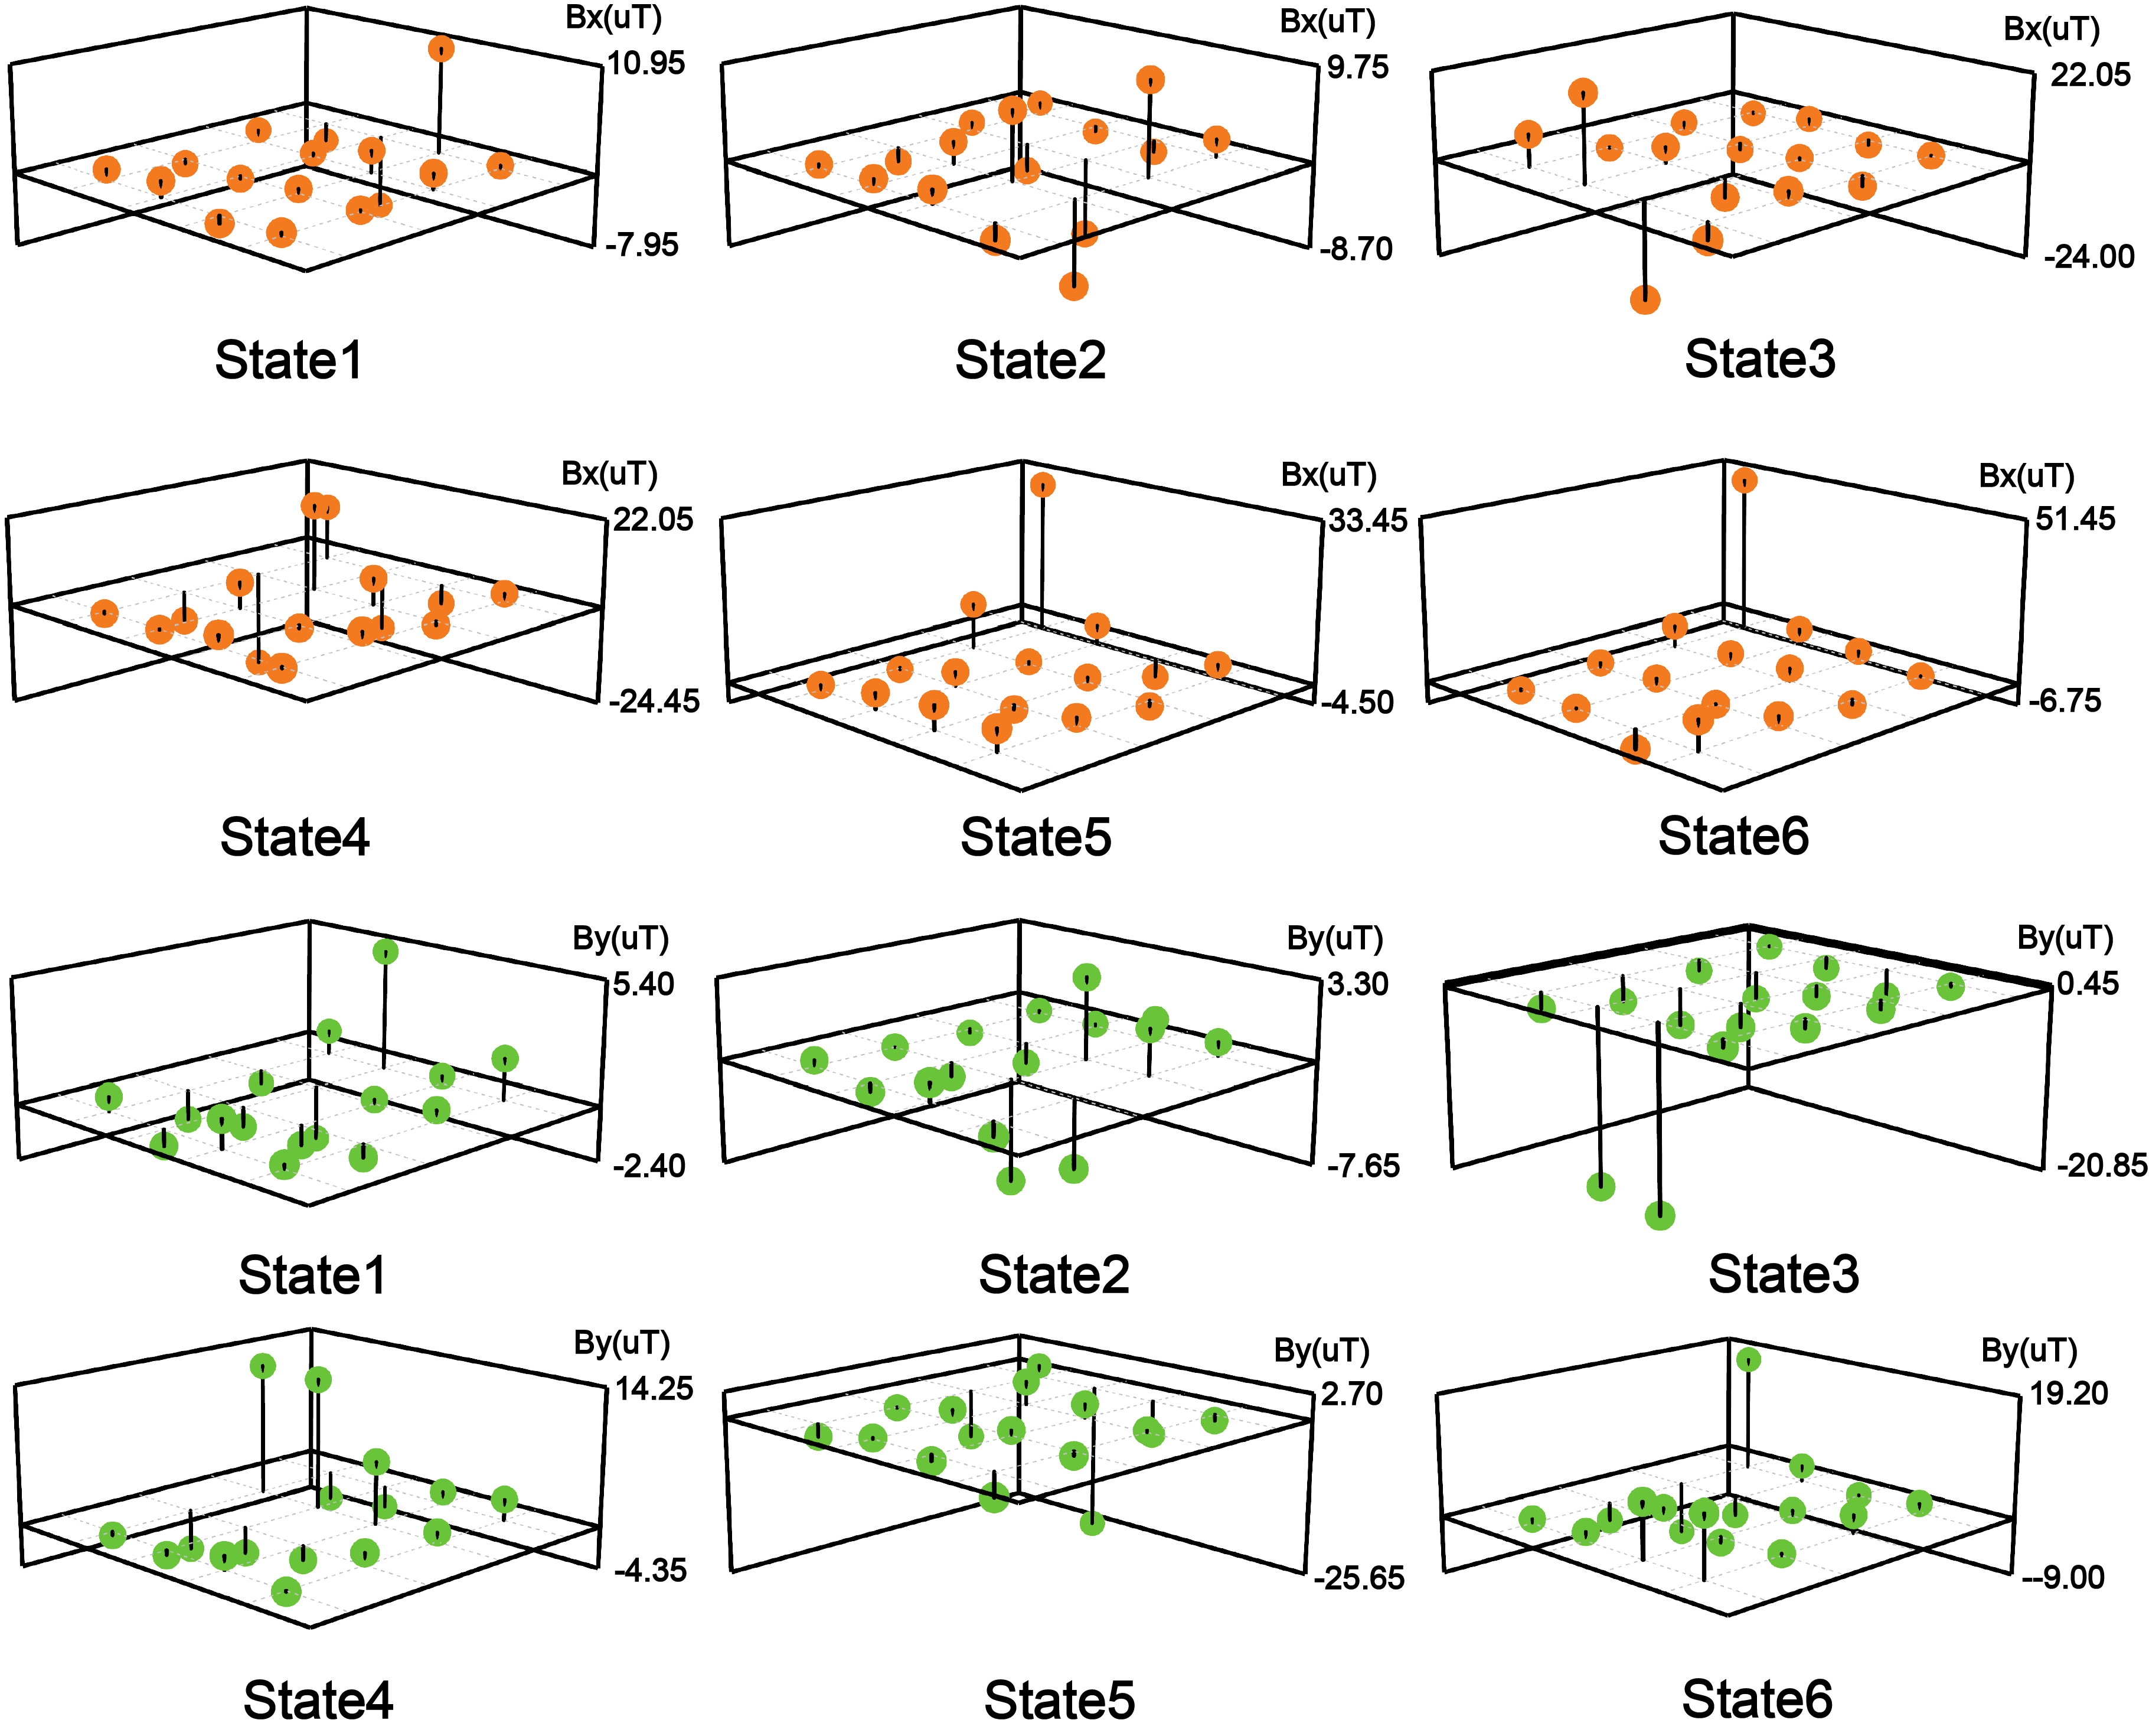


**Supplementary** Figure 12. **The corresponding By and Bz magnetic signals in six stages of two car control system.**

**REFERENCE**

1. Hu, H. *et al.* Wireless Flexible Magnetic Tactile Sensor with Super-Resolution in Large-Areas. *ACS Nano* (2022) doi:10.1021/acsnano.2c08664.

2. Zhou, Y. *et al.* Giant magnetoelastic effect in soft systems for bioelectronics. *Nature Materials* doi:10.1038/s41563-021-01093-1.

3. Hellebrekers, T., Kroemer, O. & Majidi, C. Soft Magnetic Skin for Continuous Deformation Sensing. *Advanced Intelligent Systems* **1**, 1900025 (2019).

4. Kim, Y. & Zhao, X. Magnetic Soft Materials and Robots. *Chemical Reviews* (2022) doi:10.1021/acs.chemrev.1c00481.
